1 Molecular and transcriptional structure of the petal and leaf circadian clock in *Petunia*  
2 *hybrida*

3 Marta I. Terry<sup>1</sup>, Marta Carrera-Alesina<sup>1</sup>, Julia Weiss<sup>1</sup>, Marcos Egea-Cortines<sup>1</sup>

4 <sup>1</sup>Genética Molecular, Instituto de Biotecnología Vegetal, Universidad Politécnica de  
5 Cartagena 30202 Cartagena, Spain

6

7 Marta I. Terry - [marta.terry@edu.upct.es](mailto:marta.terry@edu.upct.es)

8 Marta Carrera-Alesina - [martacalesina@gmail.com](mailto:martacalesina@gmail.com)

9 Julia Weiss - [julia.weiss@upct.es](mailto:julia.weiss@upct.es)

10 Corresponding author: Marcos Egea-Cortines [marcos.egea@upct.es](mailto:marcos.egea@upct.es)

11 Telephone: +34868071075

12 Date of submission:

13 Number of tables: 2

14 Number of figures: 6

15 Word count:6024

16 Running title: The circadian clock of leaves and petals in petunia

17 Highlight: The petunia leaf circadian clock shows maxima during the day while petal clock  
18 does it during the night. Reaction to dark is organ specific.

19

## 20 Abstract

21

22 The plant circadian clock coordinates environmental signals with internal processes. We  
 23 characterized the genomic and transcriptomic structure of the *Petunia hybrida* W115 clock in  
 24 leaves and petals. We found three levels of evolutionary differences. First, *PSEUDO-*  
 25 *RESPONSE REGULATORS* *PhPRR5a*, *PhPRR5b*, *PhPRR7a*, *PhPRR7b*, and *GIGANTEA*  
 26 *PhGI1* and *PhGI2*, differed in gene structure including exon number and deletions including  
 27 the CCT domain of the PRR family. Second, leaves showed preferential day expression while  
 28 petals tended to display night expression. Under continuous dark, most genes were delayed in  
 29 leaves and petals. Importantly, photoperiod sensitivity of gene expression was tissue specific  
 30 as *TIMING OF CAB EXPRESSION* *PhNTOC1* was affected in leaves but not in petals, and  
 31 *PhPRR5b*, *PhPRR7b* and the *ZEITLUPE* ortholog *CHANEL*, *PhCHL*, were modified in petals  
 32 but not leaves. Third, we identified a strong transcriptional noise at different times of the day,  
 33 and high robustness at dawn in leaves and dusk in petals, coinciding with the coordination of  
 34 photosynthesis and scent emission. Our results indicate multilayered evolution of the *Petunia*  
 35 clock including gene structure, number of genes and transcription patterns. The major  
 36 transcriptional reprogramming of the clock in petals, with night expression may be involved  
 37 in controlling scent emission in the dark.

38

39 **Keywords:** Circadian rhythms, free running conditions, photoperiod, paralogs, *Petunia*  
 40 *hybrida*, Solanaceae, transcriptional noise.

41 **Abbreviations:** CCT: CONSTANS, CONSTANS-like, and TIMING OF CAB  
 42 EXPRESSION 1 domain, Ct: Cycle threshold, PaxiN: *Petunia axillaris*, PhACT: *ACTIN*,  
 43 PhELF4: *EARLY FLOWERING 4*, PhFKF: *FLAVIN-BINDING KELCH REPEAT F-BOX*,  
 44 PhGI1: *GIGANTEA 1*, PhGI2: *GIGANTEA 2*, PhLHY: *LATE ELONGATED HYPOCOTYL*,  
 45 PhPRRs (*PhPRR3*, *PhPRR5a*, *PhPRR5b*, *PhPRR7a*, *PhPRR7b* and *PhPRR9*): *PSEUDO-*  
 46 *RESPONSE REGULATORS*, PhTOC1: *TIMING OF CAB EXPRESSION 1*, PhCHL: *CHANEL*  
 47 (*ZEITLUPE*), Ph: *Petunia hybrida*, PinfS6: *Petunia inflata*, REG: Response regulatory  
 48 domain, ZT: Zeitgeber time.

49

## 50 **Introduction**

51 Organisms, from bacteria to human beings, are subjected to periodic oscillations in the  
 52 environment due the planet rotation around its axis. Circadian clocks are a complex set of  
 53 genes allowing organisms to anticipate and adapt to daily environmental variations. In plants,  
 54 the circadian clock is a network of interlocked loops comprising transcriptional, translational  
 55 and posttranslational coordination (Harmer, 2009). Circadian processes have been studied in  
 56 plants for a long period of time (see McClung for a historical overview, (McClung CR,  
 57 2006)). Most molecular studies have been done in *Arabidopsis thaliana*. The Arabidopsis core  
 58 clock is formed by several genes. Two MYB transcription factors *CIRCADIAN CLOCK*  
 59 *ASSOCIATED 1 (CCA1)*, *LATE ELONGATED HYPOCOTYL (LHY)* and the *PSEUDO*  
 60 *RESPONSE REGULATOR TIMING OF CAB EXPRESSION (TOC1)* form the so-called core  
 61 clock. Later studies found other clock components including the *PSEUDO-RESPONSE*  
 62 *REGULATOR* gene family (*PRR*), out of which *PRR3*, *PRR5*, *PRR7* and *PRR9* are clock  
 63 genes, and the Evening Complex (EC), which is formed by the *EARLY FLOWERING 3*  
 64 (*ELF3*), *EARLY FLOWERING 4 (ELF4)* and *LUX ARRHYTMO (LUX)* proteins. In addition,  
 65 other genes playing a key role and considered part of the clock include the protein with blue  
 66 light reception capacity *ZEITLUPE (ZTL)* and the single copy gene *GIGANTEA (GI)*. The  
 67 various models developed are based on mutually repressing genes and a set of activating  
 68 genes coded by the *REVEILLE* MYB transcription factors (Hsu *et al.*, 2013). Every new  
 69 discover has added a level of complexity and new interpretation of the circadian clock model  
 70 (Hernando *et al.*, 2017).

71

72 Two aspects emerge from comparative genomics with lower organisms and within higher  
 73 plants. First the core clock components identified in the picoeukaryote *Ostreococcus* comprise  
 74 a *MYB* gene homolog to *LHY* and a *PRR* gene similar to *TOC1* (Corellou *et al.*, 2009). There  
 75 is an additional blue-light receptor component with histidine kinase activity and circadian  
 76 clock effects (Djouani-Tahri *et al.*, 2011). So, basic clocks maybe found with two or maybe  
 77 three components that function via transcriptional control. A second aspect is that the fine  
 78 tuning of the different clock modules is based to a large extent on protein-protein interactions.  
 79 As protein complexes require certain stoichiometries to maintain their function they are target  
 80 of genetic constraints in terms of gene dosages and are especially sensitive to gene

81 duplications. Duplicated genes follow four paths including gene loss, maintenance of  
82 redundancy, subfunctionalization or neofunctionalization (Airoidi and Davies, 2012). Plant  
83 genomes have been subject to genome duplications and, in some cases, followed by non-  
84 random elimination of duplicated genes (Adams and Wendel, 2005; Wendel *et al.*, 2016). In  
85 *Brassica*, polyploidization events have involved subsequent gene loss but with a preferential  
86 retention of circadian clock genes as compared to house-keeping genes, supporting a gene  
87 dosage sensitivity model (Lou *et al.*, 2012).

88

89 The genomes of the garden petunia and its ancestors *Petunia axillaris* and *P. integrifolia* have  
90 been recently sequenced (Bombarely *et al.*, 2016). Petunia forms an early branching in the  
91 Solanaceae clade departing from *Solanum lycopersicon*, *S. tuberosum*, *Nicotiana spp.* and  
92 *Capsicum spp.* that have a chromosome number of n=12. Petunia has n=7 and this, together  
93 with a high activity of transposition, may have shaped a somewhat different genome  
94 evolution. Petunia shares a paleohexaploidization specific to the Solanaceae. A comprehensive  
95 analysis of the circadian clock genes found in the *Petunia* genomes shows that there is a set of  
96 genes that has remained as single copy. These include the petunia orthologs for *PRR9*, *PRR3*,  
97 *TOC1* and *LHY*. In contrast, other genes are present in two to four copies, *PRR7*, *PRR5*, *GI*,  
98 *ELF3* or *ELF4* (Bombarely *et al.*, 2016). Altogether these data indicate a possible departure of  
99 the circadian clock network from the one known in Arabidopsis, and suggests the evolution of  
100 the clock at different levels including gene structure, expression pattern and genetic functions.

101

102 The bulk of work on plant circadian rhythms has been done in Arabidopsis using leaf tissue  
103 and seedlings. Like in animals, there is important evidence that the circadian clock expression  
104 network differs between different organs. The current view is that the shoot apical meristem  
105 may work as a center of coordination (Takahashi *et al.*, 2015), and leaves and roots differ in  
106 the regulatory network, as a result of differences in light inputs (James *et al.*, 2008; Bordage  
107 *et al.*, 2016).

108

109 Petal development starts with the activation of the so-called B function genes in both  
110 gymnosperms and angiosperms (Theissen and Becker, 2004). The initial transcriptional  
111 activation is followed at early stages by an autoregulatory positive regulation of the MADS-

box genes controlling petal morphogenesis in *Antirrhinum*, *Arabidopsis* and *petunia* (Schwarz-Sommer *et al.*, 1992; Goto and Meyerowitz, 1994; Jack *et al.*, 1994; Zachgo *et al.*, 1995; Samach *et al.*, 1997; Vandenbussche *et al.*, 2004). Once organ identity is established and right after anthesis, there is a transcriptional reprogramming (Manchado-Rojo *et al.*, 2012). Furthermore, in sympetalous flowers with petals forming a tube and a limb, both parts of the flower appear to have different functions and transcriptional control (Delgado-Benarroch *et al.*, 2009; Manchado-Rojo *et al.*, 2014). The petal function after anthesis includes concealing the sexual organs and attracting pollinators. The lifespan of a flower is relatively short with most flowers surviving two to five days after anthesis. After anthesis, metabolism and scent emission changes rapidly (Muhlemann *et al.*, 2012; Weiss *et al.*, 2016). Flowers enter rapid senescence upon pollination as a result of ethylene release (Shaw *et al.*, 2002; van Doorn and Woltering, 2008; Liu *et al.*, 2011).

Floral scent release depends on petal development in a quantitative way (Manchado-Rojo *et al.*, 2012), and is circadian regulated in monocots and dicots such as *Antirrhinum*, *Narcissus*, rose or *petunia* (Helsper *et al.*, 1998; Kolosova *et al.*, 2001; Verdonk *et al.*, 2003; Hoballah *et al.*, 2005; Ruíz-Ramón *et al.*, 2014). Most flowers analyzed emit scent preferentially during the day or during the night. The *LHY* and *ZTL* orthologs control scent emission in *Petunia* and *Nicotiana attenuata* (Fenske *et al.*, 2015; Yon *et al.*, 2015; Terry *et al.*, 2019). Both emit higher quantities during the night, indicating an identity and circadian component controlling this trait.

In the current work, we have addressed the structure of the *petunia* circadian clock from three different perspectives. The gene structure diverges as *PRR* paralogs have different intron numbers and *PhGII* and *PhGI2* vary in the coding region. The transcriptional structure showed maximum expression during the day in leaves and during the dark in petals. This maximum tended to delay in both tissues under constant darkness conditions. We further identified opposite levels of transcriptional noise at dawn in leaves and dusk in petals. Our results reflect the evolution of the plant circadian clock at different overlapping levels and indicate an organ specific transcriptional structure of the plant circadian clock.

## Materials and Methods

## 144 **Plant materials and experiment design**

145 We used the *Petunia hybrida* W115 Mitchell for all the analysis. Plants were grown in the  
146 greenhouse under natural conditions. Experiments under controlled conditions in growth  
147 chambers were performed as described (Mallona *et al.*, 2011a), with the following  
148 modifications. For the control experiment, plants were adapted to light:dark growth chamber  
149 conditions for at least 1 week. Day:night (12LD) conditions were matched with thermoperiods  
150 of 23 °C:18 °C during the light and dark periods. Zeitgeber time (ZT) was defined as ZT0 for  
151 light on and ZT12 for light off. In the second experiment, plants were transferred from 12LD  
152 cycle to a continuous dark cycle (12DD) with the same temperature regimes.

153 Flowers were marked before opening, and samples were taken at day 2-3 after anthesis. We  
154 used the petal limbs for all experimental procedures. We used young leaves with a length of  
155 1.5-2.5 cm for all the experiments. Sampling of petal limbs and leaves was made every three  
156 hours, starting at ZT0 and tissues were immediately frozen in liquid nitrogen. In the case of  
157 12DD experiment, sampling also started at ZT0, during the first 24h under continuous dark.

158

## 159 **Phylogeny and bioinformatics**

160 Gene models of Solanaceae were obtained from (<https://solgenomics.net/>), *Antirrhinum* from  
161 (<http://bioinfo.sibs.ac.cn/Am/>) (Li *et al.*, 2019b), TAIR (<https://www.arabidopsis.org/>),  
162 Phytozome (<https://phytozome.jgi.doe.gov/pz/portal.html>) and NCBI  
163 (<https://www.ncbi.nlm.nih.gov/>). We used the corresponding predicted proteins to identify the  
164 intron-exon boundaries using Genewise (Birney *et al.*, 2004). The corresponding exon-intron  
165 boundaries were plotted using the exon-intron graphic maker  
166 (<http://wormweb.org/exonintron>). Protein alignment was performed with CLUSTALX  
167 (Larkin *et al.*, 2007). Phylogenetic analysis was performed with the R libraries “ape” and  
168 “phangorn” (Paradis *et al.*, 2004; Schliep, 2011) (R version 3.5.1), using the Maximum  
169 Likelihood as statistical method, JTT (Jones, Taylor and Thornton, (Jones *et al.*, 1992)) as  
170 model of amino acid substitution and 500 bootstrap replicates. Trees were visualized and  
171 annotated with “ggtree” (Yu *et al.*, 2017) using R. Protein domains were predicted using the  
172 web-based tool PROSITE (Hulo *et al.*, 2006), schematic proteins were plotted with the R  
173 package “drawProteins” (Brennan, 2018). The protein sequences used in the phylogenetic  
174 reconstruction are listed in the Supplementary Table S1 and Supplementary Table S2.

175

176 Detection of rhythmic gene expression was performed using the non-parametric statistical  
177 algorithm JTK\_CYCLE (Hughes *et al.*, 2010) implemented in the R package “MetaCycle”  
178 (Wu *et al.*, 2016). We analyzed leaves and petals, under two light conditions, 12h light/12h  
179 dark (12LD) and constant darkness (12DD). Differences between two time series, were tested  
180 using an harmonic ANOVA (HANOVA) implemented in the R package “DODR” (Thaben  
181 and Westermarck, 2016). We plotted the graphics with “ggplot2” (Wickman, 2017).

182

### 183 **Gene expression analysis by qPCR**

184 RNA was extracted from three biological replicates per time point of leaves and corollas  
185 using acid phenol (Box *et al.*, 2011). Concentrations were measured using NanoDrop  
186 (Thermo-Fisher). Equal amounts of total RNA were used to obtain cDNA using Maxima kits  
187 (Thermo-Fisher).

188 PCR analysis was performed as described before (Mallona *et al.*, 2010), the following  
189 protocol was used for 40 cycles: 95 °C for 5 s, 60 °C for 20 s and 72 °C for 15 s (Clontech  
190 SYBR Green Master Mix and Mx3000P qPCR Systems, Agilent Technologies). Primers for  
191 circadian clock genes were designed using pcrEfficiency (Mallona *et al.*, 2011b)  
192 (Supplementary Table S3) and the following protocol was used for 40 cycles: 95 °C for 5 s,  
193 60 °C for 20 s (55 °C for *PhGII* and *PhGI2*) and 72 °C for 15 s. Samples were run in  
194 duplicate. Primer combinations were tested with genomic DNA from Mitchell and we found  
195 that all of them gave a single copy DNA on agarose gels. The endpoint PCR was further  
196 verified by melting point analysis where all primer combinations gave a single peak of  
197 melting (Supplementary Fig. S1). Normalized expression was calculated as described  
198 (Schmittgen and Livak, 2008) and *PhACT* was the internal control gene, a stable gene in  
199 circadian studies in petunia leaves and petals (Terry *et al.*, 2019).

200

## 201 **Results**

### 202 **The duplicated *PRR5*, *PRR7* and *GI* diverge in intron number and coding sequence**

203 We used the laboratory line *Petunia hybrida* W115, also known as Mitchell, which contains



the circadian clock genes corresponding to *P. axillaris* (Bombarely *et al.*, 2016) for a detailed analysis of the structure of the *PRR* and *GI* paralogs. Several genes forming the morning and evening loops of the circadian clock in petunia have undergone gene duplication. The genome of petunia has seven *PRR* genes as *PRR7* and *PRR5* are duplicated both in *P. axillaris* and *P. integrifolia* while Arabidopsis has the canonical set of five genes, *PRR1* or *TOC1*, *PRR3*, *PRR5*, *PRR7* and *PRR9* involved in circadian regulation (Bombarely *et al.*, 2016). We reconstructed a phylogenetic tree of *PRR* genes of Solanaceae and Arabidopsis (Supplementary Table S1) in order to deduce the evolutionary relationships of the duplicated genes. As found previously for other Angiosperms, the *PRR* genes of Solanaceae form three major clades: the *TOC1/PRR1* clade, the *PRR7/3* clade and the *PRR9/5* clade (Fig. 1) (Takata *et al.*, 2010). The *PRR5a* genes of *P. axillaris*, *P. integrifolia* are closer to the Arabidopsis *AtPRR5* while the rest of the *PRR* genes of Solanaceae, including the *PRR5b*, form an additional subclade. This topology indicates that the *PRRa* paralogs may be an ancestral form and the *PRRb* may have been formed later and retained, in some cases as single copy genes. The *PRR7* genes also showed a similar topology where *PaxiNPRR7a* and *PinfS6PRR7a* are closer to the Arabidopsis gene than the single copy genes of the rest of the Solanaceae, and the *PRR7b* paralogs. This topology is also seen in petunia *PRR9*, *PRR3* and *TOC1* that are somewhat between the Arabidopsis gene and the rest of the Solanaceae, according to the early departure of *Petunia* from the rest of the family (Bombarely *et al.*, 2016).

223

We found that the gene models for *PhPRR5a* and *PhPRR5b* differ in the number of exons comprising the coding region as *PhPRR5a* has seven and *PhPRR5b* eight exons (Supplementary Fig. S2). The gene model in Arabidopsis comprises 6 exons in AT5G24470 (*AtPRR5*), indicating that changes in intron-exon structure has occurred in the evolution of the *PRR* family. The number of exons also differed between *PhPRR7a* with eight exons while *PhPRR7b* had seven exons. The Arabidopsis AT5G02810 *AtPRR7* has nine exons out of which eight correspond to coding region, thus coinciding with the phylogenetically closer *PhPRR7a*.

232

The *PRR* family of Arabidopsis has two conserved domains: REG (Response Regulatory Domain) and a CCT (CONSTANS, CONSTANS-like, and TIMING OF CAB EXPRESSION 1 [TOC1/PRR1]) (Liu *et al.*, 2016) (Supplementary Fig. S3A). We used Arabidopsis as



model and we compared it with petunia sequences. We found that all the PRR members of *P. axillaris* and *P. inflata* shared the REG domain (Supplementary Fig. S3A). The CCT domain was found in all the coding genes except for PaxiNPRR7b, PinfPRR7a and PinfPRR7b. The presence of the CCT domain in PaxiNPRR7a and absence from the rest of the gene group in petunia was surprising, thus we analyzed other Solanaceae, member of the Convolvulaceae (*Cuscuta australis* and *Ipomea nil*) and Plantaginaceae (*Antirrhinum majus*). We found that the CCT domain was absent in the Solanaceae analyzed (*Capsicum annuum*, *C.baccatum*, *Nicotiana benthamiana*, *N.sylvestris*, *N.tabacum*, *N.tomentosiformis*, *Petunia axillaris*, *P. inflata*, *Solanum lycopersicum*, *S.melongena*, *S.pennellii*, *S.pimpinellifolium*, *S.tuberosum*) (Supplementary Fig. S3B). However, the CCT domain could be found in the rest of the species analyzed. This indicates an early change in the PRR7 family in Solanaceae with possible implications in clock functioning.

*GIGANTEA* is a single copy gene in the Arabidopsis genome (Fowler *et al.*, 1999) and it is found in one to three copies in the Solanaceae genomes (Bombarely *et al.*, 2016). The genes *PaxiNGI1* and *PaxiNGI2* are present in the genome of *P. hybrida* Mitchell. PhGI1, PinfS6GI1 and PinfS6GI1 share an N-terminus conserved with AtGI that was absent in PhGI2 (Fig. 2, Supplementary Fig. S4, Supplementary Table S2). Furthermore, PhGI2 has a 41 amino acid insertion that was not conserved in PinfS6GI2 or other GI genes. The PinfS6GI3 is much shorter than the other paralogs, a feature conserved in *N. benthamiana* GI3 (Fig. 2). The PinfSGI1 had an additional C-terminal fragment of 105 aminoacids absent from the rest of the GI genes analyzed (Fig. 2, Supplementary Fig. S4).

We can conclude that the structural evolution of core circadian clock genes has occurred at several levels including changes in the number of retained paralogs, gene structure and coding region.

**The leaf clock has its maximum during the day while the petal clock shifts towards the night**

The current model of the plant circadian clock defines three loops called morning, central and evening loop. These describe the time of the day when certain genes are preferentially expressed (Pokhilko *et al.*, 2012). We established the expression patterns of the different

clock genes in leaves and petals. As the genes contained in *P.hybrida cv Mitchell* correspond to *P.axillaris*, we further describe them as *Ph* genes. These included the morning loop genes *PhPRR9*, *PhPRR7a*, *PhPRR7b*, *PhPRR5a*, *PhPRR5b* and *PhPRR3*. The core loop was represented by *PhTOC1* and *PhLHY*. Finally, the evening genes analyzed included *PhGII*, *PhGI2*, *PhELF4*, *PhCHL* and *PhFKF*. This analysis was performed in petunia that was acclimated to light:dark conditions of 12 hour light and 12 dark (12LD) or continuous dark (12DD) conditions.

We compared three parameters between leaves and petals at 12 hours light/12 hours dark: rhythmicity of expression (oscillation), time point with maximum expression (phase) as well as amplitude, defined as is the difference between the peak or trough (maximum or minimum) and the mean value of a wave (Supplementary Table S4). Concerning the rhythmicity, most genes showed a rhythmic oscillation pattern except *PhELF4* and *PhCHL* in leaves, and *PhCHL* and *PhPRR7* in petals (Supplementary Table S4).

Concerning the time of peak expression, most genes had their maximum expression during the light phase in leaves, except *PhELF4* and *PhLHY* at ZT15 and ZT21 respectively. The light phased genes peaked either during the morning at ZT4.5 (*PhPRR5a* and *PhCHL*), during midday at ZT 7.5 (*PhPRR5b*, *PhPRR7a*, *PhPRR9* and *PhTOC1*), towards the afternoon at ZT9 (*PhGII*, *PhGI2*, *PhPRR3* and *PhPRR7b*) or at dusk at ZT 10.5 (*PhFKF*). In contrast, most of these genes shifted their expression maximum to the dark period in petals (Fig. 3) with the exception of *PhCHL*, *PhPRR9* and *PhPRR7a*. Among those genes that maintained their expression peak during the day or night, *PhPRR9*, *PhCHL* and *PhELF4* showed a delay and *PhPRR7a* an advance of 1.5 hours compared to leaves. The genes that reached their maximum during the dark period in petals could be divided in those with a peak expression early at night at ZT12 (*PhGI2* and *PhPRR7b*), a peak towards the middle of the night at ZT 13.5 and ZT15 (*PhGII*, *PhPRR3*, *PhPRR5a* and *PhPRR5b*, *PhFKF*) and those with a maximum expression at the end of the night at ZT21 (*PhELF4* and *PhTOC1*) (Table 1). The only gene showing a maintained expression maximum in leaves and petals was *PhLHY*.

We also found differences in amplitude between tissues. In general, amplitude of the clock genes was higher in leaves than in petals including *PhGII*, *PhGI2*, *PhFKF* and the *PRR* genes

298 *PhPRR9*, *PhPRR7b* and *PhTOC1*. The only gene showing larger amplitude in petals was  
299 *PhELF4* (Fig. 4, Supplementary Table S4). From all our observations we can conclude that  
300 the clock transcriptional structure differs in several ways between leaves and petals. First a  
301 robust rhythmic pattern was observed for all genes tested except *PhCHL* that was arrhythmic,  
302 *PhELF4* in leaves and *PhPRR7a* in petals. Most genes showed day phase in leaves and night  
303 phase in petals. Finally, the petal clock was somewhat dampened compared to leaves.

304

### 305 **The clock shows higher oscillation in petals than leaves under continuous dark**

306 In order to study the entrainment of the petunia circadian clock to the light:dark cycle, petunia  
307 plants were transferred from light:dark (12LD) conditions to continuous darkness (12DD).  
308 Under constant darkness the genes *PhLHY* and *PhPRR7a* lost their significant oscillations in  
309 leaves (Table 1). Interestingly, the gene *PhELF4* that was not rhythmic under LD conditions  
310 (Table 1) but displayed a robust oscillation in leaves under 12DD conditions. Finally,  
311 *PhPRR9* was not rhythmically expressed under a 12DD cycle in petals (Table 1). The rest of  
312 the genes analyzed maintained a rhythmic expression except for *PhCHL* that lacked a rhythm  
313 in any of the tissues or conditions analyzed, and *PhPRR7a* that was not rhythmic in petals.

314

315 We compared the expression between 12LD and 12DD in leaves (Fig. 4). We classified the  
316 clock genes in three groups either showing a delay in maximum expression between 1.5 and  
317 7.5 hours (*PhPRR9*, *PhPRR5a*, *PhPRR5b*, *PhTOC1*, *PhGII*, *PhGI2*, *PhFKF* and *PhCHL*) an  
318 advance: *PhPRR7b*, *PhPRR3* (1.5 hours) and *PhLHY* (18 hours) or a maintained maximum  
319 expression regardless of photoperiod (Table 1) (*PhPRR7a* and *PhELF4*).

320 In petals, *PhPRR9*, *PhPRR7b*, *PhPRR5b*, *PhGII*, *PhGI2* and *PhCHL* delayed their maximum  
321 expression between 1.5 and 10.5 hours. *PhPRR7a* and *PhLHY*, peaked 1.5 and 19.5 hours  
322 earlier, respectively. The last group included those genes that did not show differences in  
323 phase under 12LD or 12DD conditions: *PhPRR5a*, *PhPRR3*, *PhTOC1*, *PhELF4* and *PhFKF*  
324 (Table 1).

325 Altogether, *PhLHY* showed advanced expression under DD conditions while *PhGII*, *PhGI2*,  
326 *PhPRR5b*, *PhPRR9* and *PhCHL* were delayed in both leaves and petals. The only gene that  
327 remained robust was *PhELF4*. Thus, these genes were homogenously affected by

328 photoperiod. In contrast, *PhFKF*, *PhPRR5a*, *PhPRR7a*, *PhPRR7b*, *PhPRR3* and *PhTOC1*  
329 showed an organ specific change in phase in response to free running conditions (Table 1).

330

331 We compared the amplitude of clock genes in petunia leaves and petals under 12LD and  
332 12DD. In leaves, we found that all genes showed a lower amplitude in continuous darkness  
333 except *PhELF4* displaying higher amplitude under 12DD (Supplementary Table S4). In petals  
334 the rhythmic expression dampened in *PhPRR9*, *PhPRR7a*, *PhPRR7b*, *PhPRR3*, *PhTOC1*,  
335 *PhGII*, *PhGI2*, *PhFKF*, *PhCHL* and *PhLHY*. In contrast, the rhythm of *PhPRR5a*, *PhPRR5b*  
336 and *PhELF4* had higher amplitudes (Supplementary Table S4).

337

### 338 **Rhythmicity and photoperiod-sensitivity are tissue specific**

339 An important paradigm in the analysis of circadian clock gene expression is the effect of free  
340 running conditions on the genes thought to have a circadian control (Somers *et al.*, 1998). We  
341 analyzed several parameters of circadian clock genes including phase, noise or amplitude in  
342 two tissues and light conditions using Harmonic ANOVA (Thaben and Westermarck, 2016).  
343 These parameters resulted in a specific gene expression pattern that was compared in both  
344 tissues under LD and DD cycles (Table 2). We found that *PhELF4*, *PhLHY*, *PhPRR5a*,  
345 *PhPRR7a* and *PhPRR9* were stable regardless of the tissue or photoperiod ( $p > 0.05$ ). In  
346 contrast, *PhFKF*, *PhGII*, *PhPRR3* and *PhTOC1* showed a different expression pattern  
347 between leaves and petals under a 12LD cycle ( $p < 0.05$ ). In contrast to LD conditions, under  
348 12DD *PhGII*, *PhPRR5b* and *PhPRR7b* were differentially expressed in leaf versus petal.  
349 When we compared leaves at 12LD versus 12DD, *PhGII*, *PhGI2* and *PhTOC1* showed  
350 significant changes whereas in petals this group included *PhGII*, *PhGI2*, *PhPRR5b*, *PhPRR7b*  
351 and *PhCHL* (Table 2).

352 These results indicate that there are two sets of genes with different rhythms in leaves and  
353 petals and a group of stable genes comprising *PhELF4*, *PhLHY*, *PhPRR5a*, *PhPRR7a* and  
354 *PhPRR9*. Furthermore, the effect of photoperiod appeared to be organ-specific for those genes  
355 that showed significant changes.

356

### 357 **Transcriptional noise is gene and tissue specific**

Although gene expression quantities were determined for the same set of mRNA extractions, the degree of significance in terms of gene expression levels was not always as expected based on average expressions. This indicated that some genes had robust expression levels while others appeared to be very variable. In order to quantify the dispersion of data, we plotted the normalized Ct values for all genes, dividing the Ct of the clock gene by the Ct of the reference gene *PhACT* (Fig. 5, Fig. 6) and calculated the coefficient of variation (CV) for all time points (Supplementary Table S5). We found that the data dispersion was very different between genes, tissues and light conditions. The gene with the maximum transcriptional noise was *PhLHY* in petals at ZT0 and 12LD (CV 24.81) while *PhPRR7a* in leaves showed the lowest at ZT0 and 12LD (CV 0.56) (Supplementary Table S5). In addition, transcriptional noise seemed to change during the day. In leaves under a light:dark cycle, the highest noise was found at ZT9 (average CV 9.19) and the lowest, at ZT18 (average CV 4.35). In contrast, in petals, the maximum noise was at ZT0 (average CV 10.33) and the minimum, at ZT12 (average CV 3.44) (Fig. 5, Supplemental Table S5). Under constant darkness, this pattern varied. Leaves, displayed the highest CV at ZT12 (average CV 7.89) and the lowest, at ZT0 (average CV 4.34). Petals showed the maximum transcriptional noise at ZT9 (average CV 9.41) and the minimum at ZT12 (average CV 3.31) (Fig. 6, Supplementary Table S5).

We can conclude that subjective time ZT0 i.e. when lights are turned on, displayed the lowest transcriptional noise in leaves and the highest in petals. When day advanced, noise increased in leaves that showed its maximum at ZT9 with opposite behavior in petals that had its lowest level of noise at ZT12 i.e. when lights were turned off. Under free running conditions, the same pattern was found as the lowest and highest noise for leaves coincided with early and late day respectively, while in petals transcriptional noise was low in the subjective night and higher noise was found at subjective time ZT9. This indicates that an endogenous component governs transcriptional noise of the clock genes, which also differs in leaves and petals.

384

## 385 Discussion

### 386 The petunia clock gene show structural evolutionary changes

The evolution of the plant circadian clock is considered an important driver of adaptation in a variety of plants including tomato, *Opuntia ficus-indica* or barley (Mallona *et al.*, 2011a;

389 Zakhrebekova *et al.*, 2012; Müller *et al.*, 2016; Müller *et al.*, 2018). The plant clock is an  
390 important coordinator of primary and secondary metabolism in plants. It defines the timing of  
391 floral scent emission in a variety of plants including *Petunia* or *Nicotiana attenuata* (Fenske  
392 *et al.*, 2015; Yon *et al.*, 2015; Terry *et al.*, 2019). The plant circadian clock appears to have a  
393 specific transcriptional structure in different tissues such as leaves, pods, seeds, or roots  
394 (Thain *et al.*, 2002; James *et al.*, 2008; Bordage *et al.*, 2016; Weiss *et al.*, 2018). As the  
395 transcriptional structure of the clock in petal is currently unknown, we used *Petunia hybrida*  
396 to perform a detailed analysis. We have characterized the structural changes in *PhPRR5a*,  
397 *PhPRR5b*, *PhPRR7a*, *PhPRR7b*, *PhGII* and *PhGI2* and the transcriptional structure of the  
398 petunia circadian clock in petals and leaves, using standard growth and free running  
399 conditions of continuous darkness.

400  
401 The complete genome paleohexaploidization of petunia, found in the Solanaceae group  
402 (Bombarely *et al.*, 2016) is reflected in the retaining of several clock genes as duplications  
403 that are found as single copy genes in Arabidopsis and other species. These include *PhPRR5a*,  
404 *PhPRR5b*, *PhPRR7a*, *PhPRR7b*, *PhGII* and *PhGI2*. Other genes that are found as single copy  
405 include *PhLHY*, *PhPRR9*, *PhPRR3*, *PhTOC1*, *PhFKF* and *PhCHL*. Interestingly genes found  
406 as single copy in petunia such as *PhTOC1*, *PhPRR9* and *PhPRR3* are found as single copy in  
407 most Solanaceae except for *N. benthamiana* that appears to have two copies of each gene (Fig  
408 1). Two of the petunia paralogs *PhPRR7a*, *PinfS6PRR7a* and *PhPRR5a* and *PinfS6PRR5a*  
409 cluster between Arabidopsis and the rest of the Solanaceae genes. In contrast the single copy  
410 genes *TOC1*, *PRR3* and *PRR9* are found as a subclade for all the Solanaceae together  
411 including *Petunia*. This indicates that there has been a loss of *PRR5* and *PRR7* paralogs in the  
412 Solanaceae that have a single copy gene, while *Petunia* has retained the older copy closer to  
413 the Arabidopsis, *Vitis vinifera* and *Amborella trichopoda* genes. The additional changes  
414 observed in the number of exons indicate a specific evolution of one paralog. Indeed, *AtPRR5*  
415 has six exons whereas *AtPRR7* presents nine exons (AT5G24470.1 and AT5G02810,  
416 consulted in TAIR database) while *PhPRR5a* and *PhPRR7b* present 7 exons whereas  
417 *PhPRR5b* and *PhPRR7a* have 8 exons, indicating possible sub or neofunctionalization of  
418 these paralogs (see below).

419 We found two domains, REG and CCT in all analyzed *TOC1*, *PRR3*, *PRR5* and *PRR9*  
420 sequences. In contrast, the CCT domain was absent in most *PRR7* paralogs in *Capsicum spp.*,  
421 *Petunia spp.*, *Solanum spp.* and *Nicotiana spp.* Interestingly, we only found the CCT domain



422 in PhPRR7a, which shared more similarities in the amino acids sequence with AtPRR7. The  
423 lack of CCT domains in Solanaceae but not in the related Convolvulaceae family suggests  
424 that this event occurred in the early history of Solanaceae. In addition, this alteration, which  
425 has been has been described in PRR orthologs in crops such as rice and soybean, can modify  
426 growth and flowering time (Lenser and Theißen, 2013; Li *et al.*, 2019a). This may result in a  
427 specific clock in the Solanaceae family.

428 The gene *GI* appeared in flowering plants and is absent in mosses or picoalgae (Linde *et al.*,  
429 2017). In the Solanaceae we found two to three copies, and in *Petunia hybrida*, there are  
430 significant differences in the coding region between *PhGI1* and *PhGI2* suggesting a  
431 diversification of functions. Furthermore, the amino acid differences between *P. axillaris* and  
432 *P. inflata* indicate species specific changes in this master regulator that maybe related to the  
433 differing environmental niches where both species grow.

434

435 We used the predicted protein sequences to infer the domain structure of GIGANTEA.  
436 Although a previous study describes that *GI* encodes a protein with six transmembrane  
437 domains (Park *et al.*, 1999), the biochemical functions of GI are not understood. Yeast two  
438 hybrid experiments performed with the Arabidopsis GI protein show that the N-terminal  
439 domain interacts with FKF1 (Sawa *et al.*, 2007), while the complete protein shows  
440 interactions with the CYCLING DOF FACTOR6 protein (Krahmer *et al.*, 2019). As the  
441 differences in protein structure found between PhGI1 and PhGI2 do not match well known  
442 domains we cannot understand their functional differences. Nevertheless, the PinfS6GI3 does  
443 lack the N terminus required for interactions with FKF1 and ZTL in Arabidopsis.

444

#### 445 **Daily expression of petunia clock genes is tissue specific**

446 The current transcriptional model of the plant circadian clock is largely based on the  
447 expression of genes in the Arabidopsis hypocotyls and leaves (Staiger *et al.*, 2013). It includes  
448 the morning, midday or core and the evening loops. During the morning, the genes *CCA1* and  
449 *LHY* repress the evening genes *GI* and *TOC1* and activate *PRR9* and *PRR7*. At the same time,  
450 *TOC1* acts repressing *GI* and *PRR9* but activating *CCA1/LHY*. On the other hand, GI  
451 stabilizes ZTL that is a *TOC1* repressor (Pokhilko *et al.*, 2010).



452 Previous studies have revealed that the circadian clock is tissue-specific (Thain *et al.*, 2002;  
453 Endo *et al.*, 2014; Bordage *et al.*, 2016). Differential expression of clock genes has been  
454 reported in several tissues including seeds, roots, leaves, stems and flowers at several  
455 developmental stages in different plant species such as bamboo (Dutta *et al.*, 2018), radish  
456 (Wang *et al.*, 2017) or daisy (Fu *et al.*, 2014). The present study has covered several clock  
457 genes, including *GI* and *PRRs* paralogs, in petunia leaves and petals and our results are  
458 consistent with the existence of organ-specific biological clocks in plants.

459

#### 460 **The expression of clock genes differs between paralogs.**

461 Changes in gene expression concerning timing, quantity and rhythm may hint at possible  
462 subfunctionalization or neofunctionalization of duplicated clock genes. We found that *PhGII*,  
463 *PhGI2*, *PhPRR7b* and *PhPRR5b* had similar expression patterns to those previously described  
464 in other plants in leaves (Fowler *et al.*, 1999; Matsushika *et al.*, 2000; Marcolino-Gomes *et al.*,  
465 2014). In contrast, *PhPRR5a* and *PhPRR7a* that were the closest paralogs to the rest of the  
466 species, showed modified expression patterns. *PhPRR5a* and *PhPRR7a* showed an advanced  
467 phase, peaking before their respective paralogs, *PhPRR5b* and *PhPRR7b*. Interestingly, in  
468 petals, *PhPRR7a* displayed a profile similar to the canonical *AtPRR7*. Moreover, the paralogs  
469 *PhGII*, *PhGI2*, *PhPRR5a*, *PhPRR5b* and *PhPRR7b* delayed their maxima to the dark period.

470

#### 471 **Leaves and petals have different clock coordination**

472 In the present work we identified significant oscillations in gene expression using the  
473 JTK\_CYCLE algorithm, a non-parametric method which also provided measures of phase  
474 and period (Hughes *et al.*, 2010). As mentioned above, most analyzed genes displayed a  
475 robust rhythm. Second, we performed an HANOVA test and we found genes that displayed a  
476 differential expression pattern, comparing tissues and light conditions. The core clock genes  
477 *LHY* and *TOC1* are found in basal picoeukaryotes, mosses, *Marchantia polymorpha* and all  
478 higher plants (Corellou *et al.*, 2009; Holm *et al.*, 2010; Linde *et al.*, 2017). We found that  
479 *PhLHY* and *PhPRR9* did not show any statistical differences regardless the tissue or light  
480 cycle. In contrast, *PhTOC1* expression pattern differed between leaves and petals. This  
481 indicates a basal change in the clock coordination between both tissues. This scenario maybe  
482 further supported by the significant changes found for *PhFKF*, *PhPRR3*, and *PhGII* between  
483 tissues. Finally, *PhGII*, a gene found only in flowering plants showed significant changes

484 between tissues and photoperiods indicating that it may play a role in the coordination  
485 between development and environmental signals.

486

### 487 **Photoperiod sensitivity is organ-specific**

488 The effect of day length on biological clocks has been widely studied. For example, floral  
489 transition is controlled by *CONSTANS (CO)* and *FLOWERING LOCUS T (FT)* genes which  
490 are regulated by the circadian clock, including *ELF3*, *ELF4*, *GI*, *LHY*, *PRRs* and *ZTL* genes  
491 (Samach *et al.*, 2000; Suárez-López *et al.*, 2001; Valverde *et al.*, 2004). These genes are  
492 capable to integrate environmental cues, mainly day length, but also temperature. Clock genes  
493 are therefore sensitive to ambient changes resulting in an adaptive advantage (Dodd *et al.*,  
494 2005). The present study revealed that a constant dark regime induced phase-shift even in the  
495 first 24h. Most analyzed genes tended to delay their maximum expression, especially in  
496 leaves. Only *PhLHY* advanced its phase both in leaves and petals. Interestingly *PhLHY* lost its  
497 rhythmic expression in leaves but it persisted in petals, similar to previous studies (Fenske *et al.*,  
498 2015). Other genes, *PhPRR7a* (in leaves) and *PhPRR9* (in petals), did not retain their  
499 rhythmicity, suggesting that the integration of environmental cues and phototransduction  
500 varies depending on the tissue. This is consistent with previous studies, that have reported the  
501 effect of light on organ-specific circadian clocks and photoperiodic sensitivity (Shimizu *et al.*,  
502 2015; Bordage *et al.*, 2016).

503 Constant dark also had an effect on oscillations, which in general tended to decrease in most  
504 analyzed genes in leaves and petals. Similar results have been reported in other plants species:  
505 *LHY/CCA1*, *ELF4*, *GI* and *TOC1* gene expression dampens under constant light or constant  
506 dark conditions in *Arabidopsis* (Wang and Tobin, 1998; Park *et al.*, 1999; Liew *et al.*, 2014;  
507 Fenske *et al.*, 2015). Loss of circadian rhythmicity could be key and be involved in responses  
508 to environmental changes, such as seasonal dormancy during winter in Japanese cedar or  
509 chestnut (Ramos *et al.*, 2005; Nose and Watanabe, 2014).

510

### 511 **Transcriptional noise is tissue-specific and depends on the photoperiod**

512 One of the main features of the transcriptional structure of circadian clocks is the capacity to  
513 integrate noisy environmental signals and internal transcriptional variation (Hogenesch and

514 Ueda, 2011). The robustness of circadian oscillation is related to the number of mRNA  
515 molecules, interactions and complex formation, and it is stabilized by the entrainment to the  
516 light:dark cycle (Gonze *et al.*, 2002).

517

518 In the present work we found that molecular noise differed in leaves and petals and it was  
519 influenced by the time of the day. While in leaves highest stability appeared at the beginning  
520 of the subjective day, petals displayed the lowest stability. This was also noticeable when  
521 plants were transferred to continuous darkness. Interestingly, the time point with the highest  
522 transcriptional noise shifted both in leaves and petals. The lowest stability advanced in petals,  
523 and delayed in leaves. Furthermore, the increased transcriptional robustness early in the day in  
524 leaves, and in the late day-early night in petals, coincide with the major functional changes in  
525 both tissues, initiation of photosynthesis and scent emission. As noise increases thereafter in  
526 both tissues, it could be that funneling transcriptional noise into robustness at certain times of  
527 the day may have biological implications to achieve consistent outputs. However, the  
528 molecular function, if any, is not understood as this is the first report of this phenomenon.

529

530 Taken together the differential transcriptional structure and response to light, we conclude that  
531 the circadian clock in leaves and petals show substantial differences, that may reflect the  
532 underlying function in controlling photosynthesis and secondary metabolism in both tissues.  
533 The functional differences between leaves and petals may rely in part on a circadian clock  
534 reprogramming during flower development.

535

## 536 **Supporting information**

537 **Fig. S1.** Melt or dissociation curve analysis of petunia genes.

538 **Fig. S2.** Exon-intron structure of *Petunia axillaris* (PaxiN) *PRR5* and *PRR7* genes.

539 **Fig. S3.** (A) Domain structure of PRRs proteins.

540 **Fig. S4.** Local alignment of GIGANTEA proteins.

541 **Table S1.** PSEUDO-RESPONSE REGULATORS (PRRs) protein accessions used in the

542 phylogenetic reconstruction and for the annotation of protein sequences.

543 **Table S2.** GIGANTEA (GI) protein accessions used in the phylogenetic reconstruction.

544 **Table S3.** Primers used for qPCR.

545 **Table S4.** Rhythmic analysis of transcriptional data.

546 **Table S5:** Coefficient of variation, gene expressions.

547

## 548 **Authors' contributions**

549 MIT, MCS, and MEC performed the experimental work; MIT, JW and MEC designed the  
550 research programme; JW and MEC secured funds; MIT, JW and MEC wrote the first draft of  
551 the manuscript and all authors commented and corrected the final manuscript.

## 552 **Acknowledgements**

553 This work was developed under projects Fundación Séneca 19398/PI/14, MICINN-FEDER  
554 BFU-2013-45148-R and BFU-2017-88300-C2-1-R.

555

## 556 **Competing interests**

557 The authors declare that they have no competing interests.

## Bibliography

**Adams KL, Wendel JF.** 2005. Polyploidy and genome evolution in plants. *Current Opinion in Plant Biology* **8**, 135–141.

**Airoidi CA, Davies B.** 2012. Gene Duplication and the Evolution of Plant MADS-box Transcription Factors. *Journal of Genetics and Genomics* **39**, 157–165.

**Birney E, Clamp M, Durbin R.** 2004. GeneWise and Genomewise. *Genome Research* **14**, 988–995.

**Bombarely Aureliano, Moser Michel, Amrad Avichai, *et al.*** 2016. Insight into the evolution of the Solanaceae from the parental genomes of *Petunia hybrida*. *Nature Plants* **2**, 1–9.

**Bordage S, Sullivan S, Laird J, Millar AJ, Nimmo HG.** 2016. Organ specificity in the plant circadian system is explained by different light inputs to the shoot and root clocks. *New Phytologist* **212**, 136–149.

**Box MS, Coustham V, Dean C, Mylne JS.** 2011. Protocol: A simple phenol-based method for 96-well extraction of high quality RNA from *Arabidopsis*. *Plant methods* **7**, 7.

**Brennan P.** 2018. drawProteins: a Bioconductor/R package for reproducible and programmatic generation of protein schematics. *F1000Research* **7**.

**Corellou F, Schwartz C, Motta J-PP, Djouani-Tahri EB, Sanchez F, Bouget F-YY.** 2009. Clocks in the Green Lineage: Comparative Functional Analysis of the Circadian Architecture of the Picoeukaryote *Ostreococcus*. *Plant Cell* **21**, 3436–3449.

**Delgado-Benarroch L, Weiss J, Egea-Cortines M.** 2009. Floral organ size control: interplay between organ identity, developmental compartments and compensation mechanisms. *Plant Signalling and Behaviour* **4**, 1–4.

**Djouani-Tahri EB, Christie JM, Sanchez-Ferandin S, Sanchez F, Bouget FY, Corellou F.** 2011. A eukaryotic LOV-histidine kinase with circadian clock function in the picoalga *Ostreococcus*. *Plant Journal* **65**, 578–588.

**Dodd AN, Salathia N, Hall A, *et al.*** 2005. Plant circadian clocks increase photosynthesis, growth, survival, and competitive advantage. *Science* **309**, 630–633.

**van Doorn WG, Woltering EJ.** 2008. Physiology and molecular biology of petal senescence. *Journal of Experimental Botany* **59**, 453–480.

**Dutta S, Biswas P, Chakraborty S, Mitra D, Pal A, Das M.** 2018. Identification , characterization and gene expression analyses of important flowering genes related to photoperiodic pathway in

bamboo. *Bmc Genomics* **19**, 1–19.

**Endo M, Shimizu H, Nohales M a., Araki T, Kay S a.** 2014. Tissue-specific clocks in *Arabidopsis* show asymmetric coupling. *Nature* **515**, 419–422.

**Fenske MP, Hewett Hazelton KD, Hempton AK, Shim JS, Yamamoto BM, Riffell J a., Imaizumi T.** 2015. Circadian clock gene *LATE ELONGATED HYPOCOTYL* directly regulates the timing of floral scent emission in *Petunia*. *Proceedings of the National Academy of Sciences* **112**, 9775–9780.

**Fowler S, Lee K, Onouchi H, Smach A, Richardson K, Morris B, Coupland G, Putterill J.** 1999. *GIGANTEA*: A circadian clock-controlled gene that regulates development in *Utricularia grandicornis* and encodes a protein with several possible membrane-spanning domains. *EMBO Journal* **18**, 4679–88.

**Fu J, Yang L, Dai S.** 2014. Conservation of *Arabidopsis thaliana* circadian clock genes in *Chrysanthemum lavandulifolium*. *Plant Physiology and Biochemistry* **80**, 337–347.

**Gonze D, Halloy J, Goldbeter A.** 2002. Robustness of circadian rhythms with respect to molecular noise. *Proceedings of the National Academy of Sciences* **99**, 673–678.

**Goto K, Meyerowitz EM.** 1994. Function and Regulation of the *Arabidopsis* Floral Homeotic Gene *Pistillata*. *Genes & Development* **8**, 1548–1560.

**Harmer SL.** 2009. The Circadian System in Higher Plants. *Annual Review of Plant Biology* **60**, 357–377.

**Helsper JPF, Davies JA, Bouwmeester HJ, Krol AF, Kampen MH Van, van Kampen MH.** 1998. Circadian rhythmicity in emission of volatile compounds by flowers of *Rosa hybrida* L. cv. *Honesty*. *Planta* **207**, 88–95.

**Hernando CE, Romanowski A, Yanovsky MJ.** 2017. Transcriptional and post-transcriptional control of the plant circadian gene regulatory network. *Biochimica et Biophysica Acta - Gene Regulatory Mechanisms* **1860**, 84–94.

**Hoballah ME, Stuurman J, Turlings TCJ, Guerin PM, Connetable S, Kuhlemeier C.** 2005. The composition and timing of flower odour emission by wild *Petunia axillaris* coincide with the antennal perception and nocturnal activity of the pollinator *Manduca sexta*. *Planta* **222**, 141–150.

**Hogenesch JB, Ueda HR.** 2011. Understanding systems-level properties: timely stories from the study of clocks. *Nature Reviews Genetics* **12**, 407–416.

**Holm K, Kallman T, Gyllenstrand N, Hedman H, Lagercrantz U.** 2010. Does the core circadian

clock in the moss *Physcomitrella patens* (Bryophyta) comprise a single loop? *BMC Plant Biol* **10**, 109–109.

**Hsu PY, Devisetty UK, Harmer SL.** 2013. Accurate timekeeping is controlled by a cycling activator in *Arabidopsis*. *eLife* **2**, e00473.

**Hughes ME, Hogenesch JB, Kornacker K.** 2010. JTK\_CYCLE: an efficient nonparametric algorithm for detecting rhythmic components in genome-scale data sets. *Journal of Biological Rhythms* **25**, 372–380.

**Hulo N, Bairoch A, Bulliard V, Cerutti L, De Castro E, Langendijk-Genevaux PS, Pagni M, Sigrist CJA.** 2006. The PROSITE database. *Nucleic Acids Research* **34**, D227–D230.

**Jack T, Fox GL, Meyerowitz EM.** 1994. *Arabidopsis* homeotic gene *APETALA3* ectopic expression: transcriptional and posttranscriptional regulation determine floral organ identity. *Cell* **76**, 703–716.

**James AB, Monreal JA, Nimmo GA, Kelly CL, Herzyk P, Jenkins GI, Nimmo HG.** 2008. The Circadian Clock in *Arabidopsis* Roots Is a Simplified Slave Version of the Clock in Shoots. *Science* **322**, 1832–1835.

**Jones DT, Taylor WR, Thornton JM.** 1992. The rapid generation of mutation data matrices from protein sequences. *Bioinformatics* **8**, 275–282.

**Kasahara M, Swartz TE, Olney MA, et al.** 2002. Photochemical properties of the flavin mononucleotide-binding domains of the phototropins from *Arabidopsis*, rice, and *Chlamydomonas reinhardtii*. *Plant physiology* **129**, 762–73.

**Kolosova N, Gorenstein N, Kish CM, Dudareva N.** 2001. Regulation of circadian methyl benzoate emission in diurnally and nocturnally emitting plants. *Plant Cell* **13**, 2333–2347.

**Krahmer J, Goraloglia GS, Kubota A, et al.** 2019. Time-resolved interaction proteomics of the GIGANTEA protein under diurnal cycles in *Arabidopsis*. *FEBS Letters* **593**, 319–338.

**Larkin MA, Blackshields G, Brown NP, et al.** 2007. Clustal W and clustal X version 2.0. *Bioinformatics* **23**, 2947–8.

**Li M-W, Liu W, Lam H-M, Gendron JM.** 2019a. Characterization of Two Growth Period QTLs Reveals Modification of *PRR3* Genes During Soybean Domestication. *Plant and Cell Physiology* **60**, 407–420.

**Li M, Zhang D, Gao Q, et al.** 2019b. Genome structure and evolution of *Antirrhinum majus* L.



Nature Plants **5**, 174–183.

**Liew LC, Hecht V, Sussmilch FC, Weller JL.** 2014. The Pea Photoperiod Response Gene *STERILE NODES* Is an Ortholog of *LUX ARRHYTHMO*. *Plant Physiology* **165**, 648–657.

**Linde A, Eklund DM, Kubota A, et al.** 2017. Early evolution of the land plant circadian clock. *New Phytologist*.

**Liu J, Li J, Wang H, Fu Z, Liu J, Yu Y.** 2011. Identification and expression analysis of ERF transcription factor genes in petunia during flower senescence and in response to hormone treatments. *Journal of Experimental Botany* **62**, 825–840.

**Liu TL, Newton L, Liu M-J, Shiu S-H, Farré EM.** 2016. A G-Box-Like Motif Is Necessary for Transcriptional Regulation by Circadian Pseudo-Response Regulators in *Arabidopsis*. *Plant Physiology* **170**, 528–539.

**Lou P, Wu J, Cheng F, Cressman LG, Wang X, McClung CR.** 2012. Preferential retention of circadian clock genes during diploidization following whole genome triplication in *Brassica rapa*. *The Plant cell* **24**, 2415–26.

**Mallona I, Egea-Cortines M, Weiss J.** 2011*a*. Conserved and divergent rhythms of CAM-related and core clock gene expression in the cactus *Opuntia ficus-indica*. *Plant Physiology* **156**, 1978–1989.

**Mallona I, Lischewsky S, Weiss J, et al.** 2010. Validation of reference genes for quantitative real-time PCR during leaf and flower development in *Petunia hybrida*. *BMC plant biology* **10**, 4.

**Mallona I, Weiss J, Egea-Cortines M.** 2011*b*. pcrEfficiency: a Web tool for PCR amplification efficiency prediction. *BMC Bioinformatics* **12**, 404.

**Manchado-Rojo M, Delgado-Benarroch L, Roca MJMJ, Weiss J, Egea-Cortines M.** 2012. Quantitative levels of *Deficiens* and *Globosa* during late petal development show a complex transcriptional network topology of B function. *The Plant journal* **72**, 294–307.

**Manchado-Rojo M, Weiss J, Egea-Cortines M.** 2014. Validation of *Aintegumenta* as a gene to modify floral size in ornamental plants. *Plant Biotechnol Journal* **12**, 1053–1065.

**Marcolino-Gomes J, Rodrigues FA, Fuganti-Pagliarini R, Bendix C, Nakayama TJ, Celaya B, Molinari HBC, Oliveira MCN de, Harmon FG, Nepomuceno A.** 2014. Diurnal Oscillations of Soybean Circadian Clock and Drought Responsive Genes. *PLOS ONE* **9**, e86402.

**Matsushika A, Makino S, Kojima M, Mizuno T.** 2000. Circadian Waves of Expression of the

APRR1/TOC1 Family of Pseudo-Response Regulators in *Arabidopsis thaliana*: Insight into the Plant Circadian Clock. *Plant and Cell Physiology* **41**, 1002–1012.

**McClung CR**. 2006. Plant circadian rhythms. *The Plant Cell* **18**, 792–803.

**Müller NA, Wijnen CL, Srinivasan A, et al.** 2016. Domestication selected for deceleration of the circadian clock in cultivated tomato. *Nat Genet* **48**, 89–93.

**Müller NA, Zhang L, Koornneef M, Jiménez-Gómez JM**. 2018. Mutations in EID1 and LNK2 caused light-conditional clock deceleration during tomato domestication. *Proceedings of the National Academy of Sciences* **115**, 7135–7140.

**Nelson DC, Lasswell J, Rogg LE, Cohen M a, Bartel B**. 2000. FKF1, a clock-controlled gene that regulates the transition to flowering in *Arabidopsis*. *Cell* **101**, 331–340.

**Nose M, Watanabe A**. 2014. Clock genes and diurnal transcriptome dynamics in summer and winter in the gymnosperm Japanese cedar (*Cryptomeria japonica* (L.f.) D.Don). *BMC plant biology* **14**, 308.

**Paradis E, Claude J, Strimmer K**. 2004. APE: Analyses of Phylogenetics and Evolution in R language. *Bioinformatics* **20**, 289–290.

**Park DH, Somers DE, Kim YS, Choy YH, Lim HK, Soh MS, Kim HJ, Kay SA, Nam HG**. 1999. Control of circadian rhythms and photoperiodic flowering by the *Arabidopsis* GIGANTEA gene. *Science* **285**, 1579–1582.

**Pokhilko A, Fernandez AP, Edwards KD, Southern MM, Halliday KJ, Millar AJ, Fernández AP**. 2012. The clock gene circuit in *Arabidopsis* includes a repressilator with additional feedback loops. *Molecular Systems Biology* **8**, 574.

**Pokhilko A, Hodge SK, Stratford K, Knox K, Edwards KD, Thomson AW, Mizuno T, Millar AJ**. 2010. Data assimilation constrains new connections and components in a complex, eukaryotic circadian clock model. *Molecular Systems Biology* **6**.

**Ramos A, Perez-Solis E, Ibanez C, et al.** 2005. Winter disruption of the circadian clock in chestnut. *Proceedings of the National Academy of Sciences of the United States of America* **102**, 7037–7042.

**Ruíz-Ramón F, Águila DJ, Egea-Cortines M, Weiss J**. 2014. Optimization of fragrance extraction: Daytime and flower age affect scent emission in simple and double narcissi. *Industrial Crops and Products* **52**.

**Samach A, Kohalmi SE, Motte P, Datla R, Haughn GW**. 1997. Divergence of function and regulation of class B floral organ identity genes. *The Plant cell* **9**, 559–570.

- Samach A, Onouchi H, Gold SE, Ditta GS, Schwarz-Sommer Z, Yanofsky MF, Coupland G.** 2000. Distinct Roles of CONSTANS Target Genes in Reproductive Development of Arabidopsis. *Science* **288**, 1613–1616.
- Sawa M, Nusinow DA, Kay SA, Imaizumi T.** 2007. FKF1 and GIGANTEA complex formation is required for day-length measurement in Arabidopsis. *Science (New York, N.Y.)* **318**, 261–265.
- Schliep KP.** 2011. phangorn: phylogenetic analysis in R. **27**, 592–593.
- Schmittgen TD, Livak KJ.** 2008. Analyzing real-time PCR data by the comparative CT method. *Nature Protocols* **3**, 1101–1108.
- Schwarz-Sommer Z, Hue I, Huijser P, et al.** 1992. Characterization of the Antirrhinum floral homeotic MADS-box gene *deficiens*: evidence for DNA binding and autoregulation of its persistent expression throughout flower development. *EMBO J.* **11**, 251–263.
- Shaw J-F, Chen H-H, Tsai M-F, Kuo C-I, Huang L-C.** 2002. Extended flower longevity of *Petunia hybrida* plants transformed with *boers*, a mutated ERS gene of *Brassica oleracea*. *Molecular Breeding* **9**, 211–216.
- Shimizu H, Araki T, Endo M.** 2015. Photoperiod sensitivity of the Arabidopsis circadian clock is tissue-specific. *Plant Signaling & Behavior* **10**, e1010933.
- Somers DE, Devlin PF, Kay SA.** 1998. Phytochromes and Cryptochromes in the Entrainment of the Arabidopsis Circadian Clock. *Science* **282**, 1488–1490.
- Staiger D, Shin J, Johansson M, Davis SJ.** 2013. The circadian clock goes genomic. *Genome biology* **14**, 208–208.
- Suárez-López P, Wheatley K, Robson F, Onouchi H, Valverde F, Coupland G.** 2001. CONSTANS mediates between the circadian clock and the control of flowering in Arabidopsis. *Nature* **410**, 1116–1120.
- Takahashi N, Hirata Y, Aihara K, Mas P.** 2015. A Hierarchical Multi-oscillator Network Orchestrates the Arabidopsis Circadian System. *Cell* **163**, 148–159.
- Takata N, Saito S, Saito CT, Uemura M.** 2010. Phylogenetic footprint of the plant clock system in angiosperms: evolutionary processes of Pseudo-Response Regulators. *BMC Evolutionary Biology* **10**, 126.
- Terry MI, Pérez-Sanz F, Díaz-Galián MV, Pérez de los Cobos F, Navarro PJ, Egea-Cortines M, Weiss J.** 2019. The *Petunia* CHANEL Gene is a ZEITLUPE Ortholog Coordinating Growth and Scent

Profiles. *Cells* **8**, 343.

**Thaben PF, Westermarck P al O.** 2016. Differential rhythmicity□: detecting rhythmicity in biological data. *Bioinformatics* (Oxford, England).

**Thain SC, Murtas G, Lynn JR, McGrath RB, Millar AJ.** 2002. The circadian clock that controls gene expression in *Arabidopsis* is tissue specific. *Plant Physiology* **130**, 102–110.

**Theissen G, Becker A.** 2004. Gymnosperm orthologues of class B floral homeotic genes and their impact on understanding flower origin. *Critical Reviews in Plant Sciences* **23**, 129–148.

**Valverde F, Mouradov A, Soppe W, Ravenscroft D, Samach A, Coupland G.** 2004. Photoreceptor Regulation of CONSTANS Protein in Photoperiodic Flowering. *Science* **303**, 1003–1006.

**Vandenbussche M, Zethof J, Royaert S, Weterings K, Gerats T.** 2004. The duplicated B-class heterodimer model: Whorl-specific effects and complex genetic interactions in *Petunia hybrida* flower development. *Plant Cell* **16**, 741–754.

**Verdonk JC, Ric de Vos CHH, Verhoeven HA, Haring MA, van Tunen AJ, Schuurink RC, de Vos CHR.** 2003. Regulation of floral scent production in petunia revealed by targeted metabolomics. *Phytochemistry* **62**, 997–1008.

**Wang J, Qiu Y, Cheng F, Chen X, Zhang X, Wang H, Song J, Duan M, Yang H, Li X.** 2017. Genome-wide identification, characterization, and evolutionary analysis of flowering genes in radish (*Raphanus sativus* L.). *BMC Genomics* **18**, 1–10.

**Wang ZY, Tobin EM.** 1998. Constitutive expression of the CIRCADIAN CLOCK ASSOCIATED 1 (CCA1) gene disrupts circadian rhythms and suppresses its own expression. *Cell* **93**, 1207–1217.

**Weiss J, Terry MI, Martos-Fuentes M, Letourneux L, Ruiz-Hernández V, Fernández JA, Egea-Cortines M.** 2018. Diel pattern of circadian clock and storage protein gene expression during seed filling in cowpea (*Vigna unguiculata*). *BMC Plant Biology* **18**, 33.

**Weiss J, Mühlemann JK, Ruiz-Hernández V, Dudareva N, Egea-Cortines M.** 2016. Phenotypic Space and Variation of Floral Scent Profiles during Late Flower Development in *Antirrhinum*. *Frontiers in Plant Science* **7**, 1–12.

**Wendel JF, Jackson SA, Meyers BC, Wing RA.** 2016. Evolution of plant genome architecture. *Genome Biology* **17**, 37.

**Wickman H.** 2017. ggplot2 - Elegant Graphics for Data Analysis (2nd Edition). *Journal of Statistical Software* **77**, 3–5.

**Wu G, Anafi RC, Hughes ME, Kornacker K, Hogenesch JB.** 2016. MetaCycle: an integrated R package to evaluate periodicity in large scale data. *Bioinformatics* **32**, 3351–3353.

**Yon F, Joo Y, Cort L, Rothe E, Baldwin IT, Kim S, Kim S.** 2015*a*. Silencing *Nicotiana attenuata* LHY and ZTL alters circadian rhythms in flowers. *New Phytologist* **203**, 1058–1066.

**Yu G, Smith DK, Zhu H, Guan Y, Lam TT-Y.** 2017. ggtree: an r package for visualization and annotation of phylogenetic trees with their covariates and other associated data. *Methods in Ecology and Evolution* **8**, 28–36.

**Zachgo S, Silva E, Motte P, Trobner W, Saedler H, Schwarz-Sommer Z.** 1995. Functional analysis of the *Antirrhinum* floral homeotic DEFICIENS gene in vivo and in vitro by using a temperature-sensitive mutant. *Development* **121**, 2861–2875.

**Zakhrabekova S, Gough SP, Braumann I, *et al.*** 2012. Induced mutations in circadian clock regulator *Mat-a* facilitated short-season adaptation and range extension in cultivated barley. *Proceedings of the National Academy of Sciences of the United States of America* **109**, 4326–4331.

## Tables

Table 1. Comparison of oscillation pattern (Oscillat.) and peak shifting of morning, midday and evening loop clock genes between leaves and petals and between 12LD and 12 DD. R: Rhythmic, AR: Arrhythmic, D/N: Day-Night

|                | 12LD      |           |                              | 12 DD     |                          |           |                          |
|----------------|-----------|-----------|------------------------------|-----------|--------------------------|-----------|--------------------------|
| Clock gene     | Leaves    | Petals    |                              | Leaves    |                          |           | Petals                   |
|                | Oscillat. | Oscillat. | Peak shift leaves vs. petals | Oscillat. | Peak shift 12LD vs. 12DD | Oscillat. | Peak shift 12LD vs. 12DD |
| Morning loop   |           |           |                              |           |                          |           |                          |
| <i>PhPRR9</i>  | R         | R         | Delay                        | R         | Delay                    | AR        | Delay                    |
| <i>PhPRR7a</i> | R         | AR        | Advance                      | AR        | Advance                  | AR        | Advance                  |
| <i>PhPRR7b</i> | R         | R         | Shift D/N                    | R         | Advance                  | R         | Delay                    |
| <i>PhPRR5a</i> | R         | R         | Shift D/N                    | R         | Delay                    | R         | Stable                   |
| <i>PhPRR5b</i> | R         | R         | Shift D/N                    | R         | Delay                    | R         | Delay                    |
| <i>PhPRR3</i>  | R         | R         | Shift D/N                    | R         | Advance                  | R         | Stable                   |
| Midday loop    |           |           |                              |           |                          |           |                          |
| <i>PhTOC1</i>  | R         | R         | Shift D/N                    | R         | Delay                    | R         | Stable                   |
| <i>PhLHY</i>   | R         | R         | Stable                       | AR        | Advance                  | R         | Advance                  |
| Evening loop   |           |           |                              |           |                          |           |                          |
| <i>PhG11</i>   | R         | R         | Shift D/N                    | R         | Delay                    | R         | Delay                    |
| <i>PhG12</i>   | R         | R         | Shift D/N                    | R         | Delay                    | R         | Delay                    |
| <i>PhELF4</i>  | AR        | R         | Delay                        | R         | Stable                   | R         | Stable                   |
| <i>PhCHL</i>   | AR        | AR        | Delay                        | AR        | Delay                    | AR        | Delay                    |
| <i>PhFKF</i>   | R         | R         | Shift D/N                    | R         | Delay                    | R         | Stable                   |

Table 2. Analysis of differential gene expression in petunia leaves and petals under two light conditions: light:dark (12LD) and constant darkness (12DD). This analysis uses Harmonic ANOVA (HANOVA) to test differences. A  $p$  value  $< 0.05$  indicated that the expression was significantly different between tissues (first and second column) or between light conditions (third and fourth column).

| Gene           | 12LD Leaf vs. Petal | 12DD Leaf vs. Petal | Leaf 12LD vs. Leaf 12DD | Petal 12LD vs. Petal 12DD |
|----------------|---------------------|---------------------|-------------------------|---------------------------|
| <i>PhCHL</i>   | 0.981               | 0.697               | 0.150                   | 0.042                     |
| <i>PhELF4</i>  | 0.154               | 0.140               | 0.390                   | 0.479                     |
| <i>PhFKF</i>   | 0.003               | 0.366               | 0.468                   | 0.318                     |
| <i>PhGII</i>   | 0.019               | 0.049               | 0.011                   | 0.009                     |
| <i>PhGI2</i>   | 0.291               | 0.298               | 0.041                   | 0.012                     |
| <i>PhLHY</i>   | 0.675               | 0.222               | 0.192                   | 0.137                     |
| <i>PhPRR3</i>  | 0.014               | 0.084               | 0.411                   | 0.872                     |
| <i>PhPRR5a</i> | 0.061               | 0.109               | 0.420                   | 0.616                     |
| <i>PhPRR5b</i> | 0.223               | 0.021               | 0.143                   | 0.004                     |
| <i>PhPRR7a</i> | 0.588               | 0.785               | 0.270                   | 0.988                     |
| <i>PhPRR7b</i> | 0.196               | 0.043               | 0.897                   | 0.009                     |
| <i>PhPRR9</i>  | 0.405               | 0.486               | 0.508                   | 0.584                     |
| <i>PhTOC1</i>  | 0.003               | 0.395               | 0.017                   | 0.351                     |



## Figure legends

**Fig. 1.** *PSEUDO-RESPONSE REGULATORS (PRRs)* phylogenetic tree. Amino acid sequences were aligned using CLUSTALX. Phylogenetic analysis was performed using the "ape" and "phangorn" R packages and trees were plotted with the library "ggtree" (R version 3.5.1). Initial tree was estimated using the neighbor-joining algorithm (NJ), and then phylogenetic trees were built with the Maximum Likelihood method (ML) and JTT (Jones, Taylor and Thornton) as model of amino acid substitution. The tree shows the bootstrap percentage (from 500 replicates) next to branches. The multiple sequence alignment is showed on the right-side. This tree contains 69 sequences from 14 species. Species abbreviations: A.majus (*Antirrhinum majus*), A.thaliana (*Arabidopsis thaliana*), A.trichopoda (*Amborella trichopoda*), C.annuum (*Capsicum annuum*), N.attenuata (*Nicotiana attenuata*), N.benthamiana (*Nicotiana benthamiana*), N.sylvestris (*Nicotiana sylvestris*), N.tomentosiformis (*Nicotiana tomentosiformis*), P.axillaris (*Petunia axillaris*), P.inflata (*Petunia inflata*), P.patens (*Physcomitrella patens*), S.lycopersicum (*Solanum lycopersicum*), S.tuberosum (*Solanum tuberosum*) and V.vinifera (*Vitis vinifera*). Accessions are listed in Supplementary Table S1.

**Fig. 2.** *GIGANTEA (GIs)* phylogenetic tree. Amino acid sequences were aligned using CLUSTALX. Phylogenetic analysis was performed using the "ape" and "phangorn" R packages and trees were plotted with the library "ggtree" (R version 3.5.1). Initial tree was estimated using the neighbor-joining algorithm (NJ), and then phylogenetic trees were built with the Maximum Likelihood method (ML) and JTT (Jones, Taylor and Thornton) as model of amino acid substitution. The tree displays the bootstrap percentage (from 500 replicates) next to branches. The multiple sequence alignment is displayed on the right-side. This tree contains 37 sequences from 25 species. Species abbreviations: A.majus (*Antirrhinum majus*), A.thaliana (*Arabidopsis thaliana*), A.trichopoda (*Amborella trichopoda*), B.distachyon (*Brachypodium distachyon*), C.arietinum (*Cicer arietinum*), F.vesca (*Fragaria vesca*), G.max (*Glycine max*), M.polymorpha (*Marchantia polymorpha*), M.truncatula (*Medicago truncatula*), N.benthamiana (*Nicotiana benthamiana*), O.sativa (*Oryza sativa*), P.axillaris (*Petunia axillaris*), P.hallii (*Panicum hallii*), P.inflata (*Petunia inflata*), P.sativum (*Pisum sativum*), S.italica (*Setaria italica*), S.lycopersicum (*Solanum lycopersicum*), S.moellendorffii (*Selaginella moellendorffii*), S.tuberosum (*Solanum tuberosum*), S.viridis (*Setaria viridis*),

*T.aestivum* (*Triticum aestivum*), *S.italica* (*Setaria italica*), *V.radiata* (*Vigna radiata*), *V.unguiculata* (*Vigna unguiculata*), *V.vinifera* (*Vitis vinifera*) and *Z.mays* (*Zea mays*). Accession are listed in Supplementary Table S2.

**Fig. 3.** Daily changes in gene expression in petunia leaves and petals (12LD). Expression of clock genes in leaves (blue) and petals (red) under light:dark (LD 12 h : 12 h). Gene expression was analyzed by qPCR and normalized to *PhACT*. ZT0 (Zeitgeber time) denoting light on, and ZT12, light off; grey area indicates dark period. Results represent mean  $\pm$  SD (n = 3).

**Fig. 4.** Daily changes in gene expression in petunia leaves and petals (12DD). Expression of clock genes in leaves (blue) and petals (red) under continuous dark. Gene expression was analyzed by qPCR and normalized to *PhACT*. Grey area indicates dark period, which includes subjective day (from ZT0, or Zeitgeber Time 0, to ZT12) and subjective night (from ZT12 to ZT24). Results represent mean  $\pm$  SD (n = 3).

**Fig. 5.** Boxplot of cycle threshold values (Ct) for petunia clock genes normalized with *PhACT* (Ct of clock gene divided by Ct of *PhACT*) in leaves (green) and petals (pink) under constant darkness (12LD) at eight time points, from ZT0 to ZT21.

**Fig. 6.** Boxplot of cycle threshold values (Ct) for petunia clock genes normalized with *PhACT* (Ct of clock gene divided by Ct of *PhACT*) in leaves (green) and petals (pink) under constant darkness (12DD), at eight time points, from ZT0 to ZT21.



Figure 1

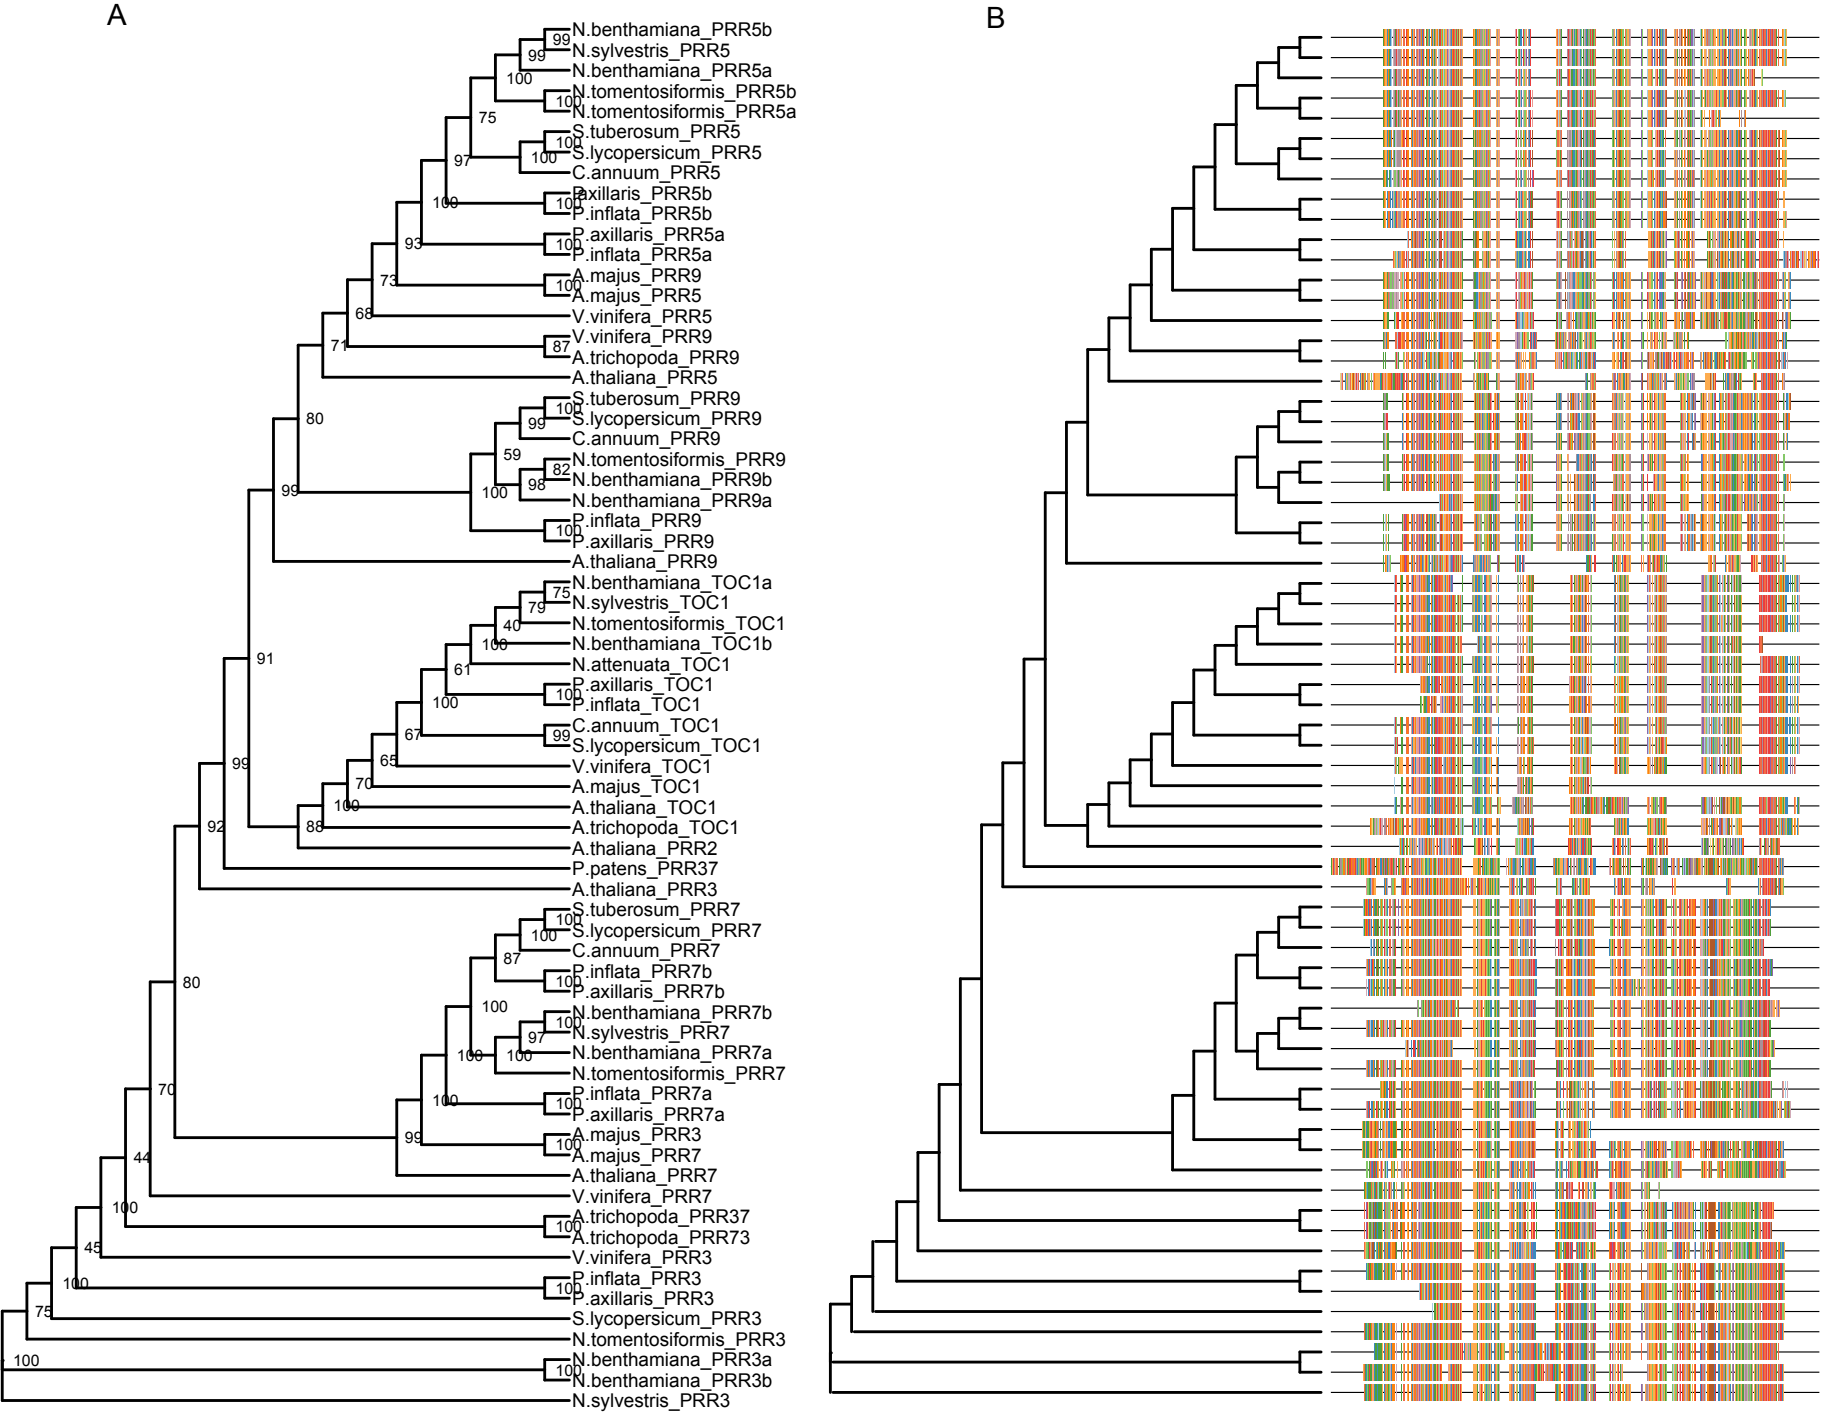

Figure 2

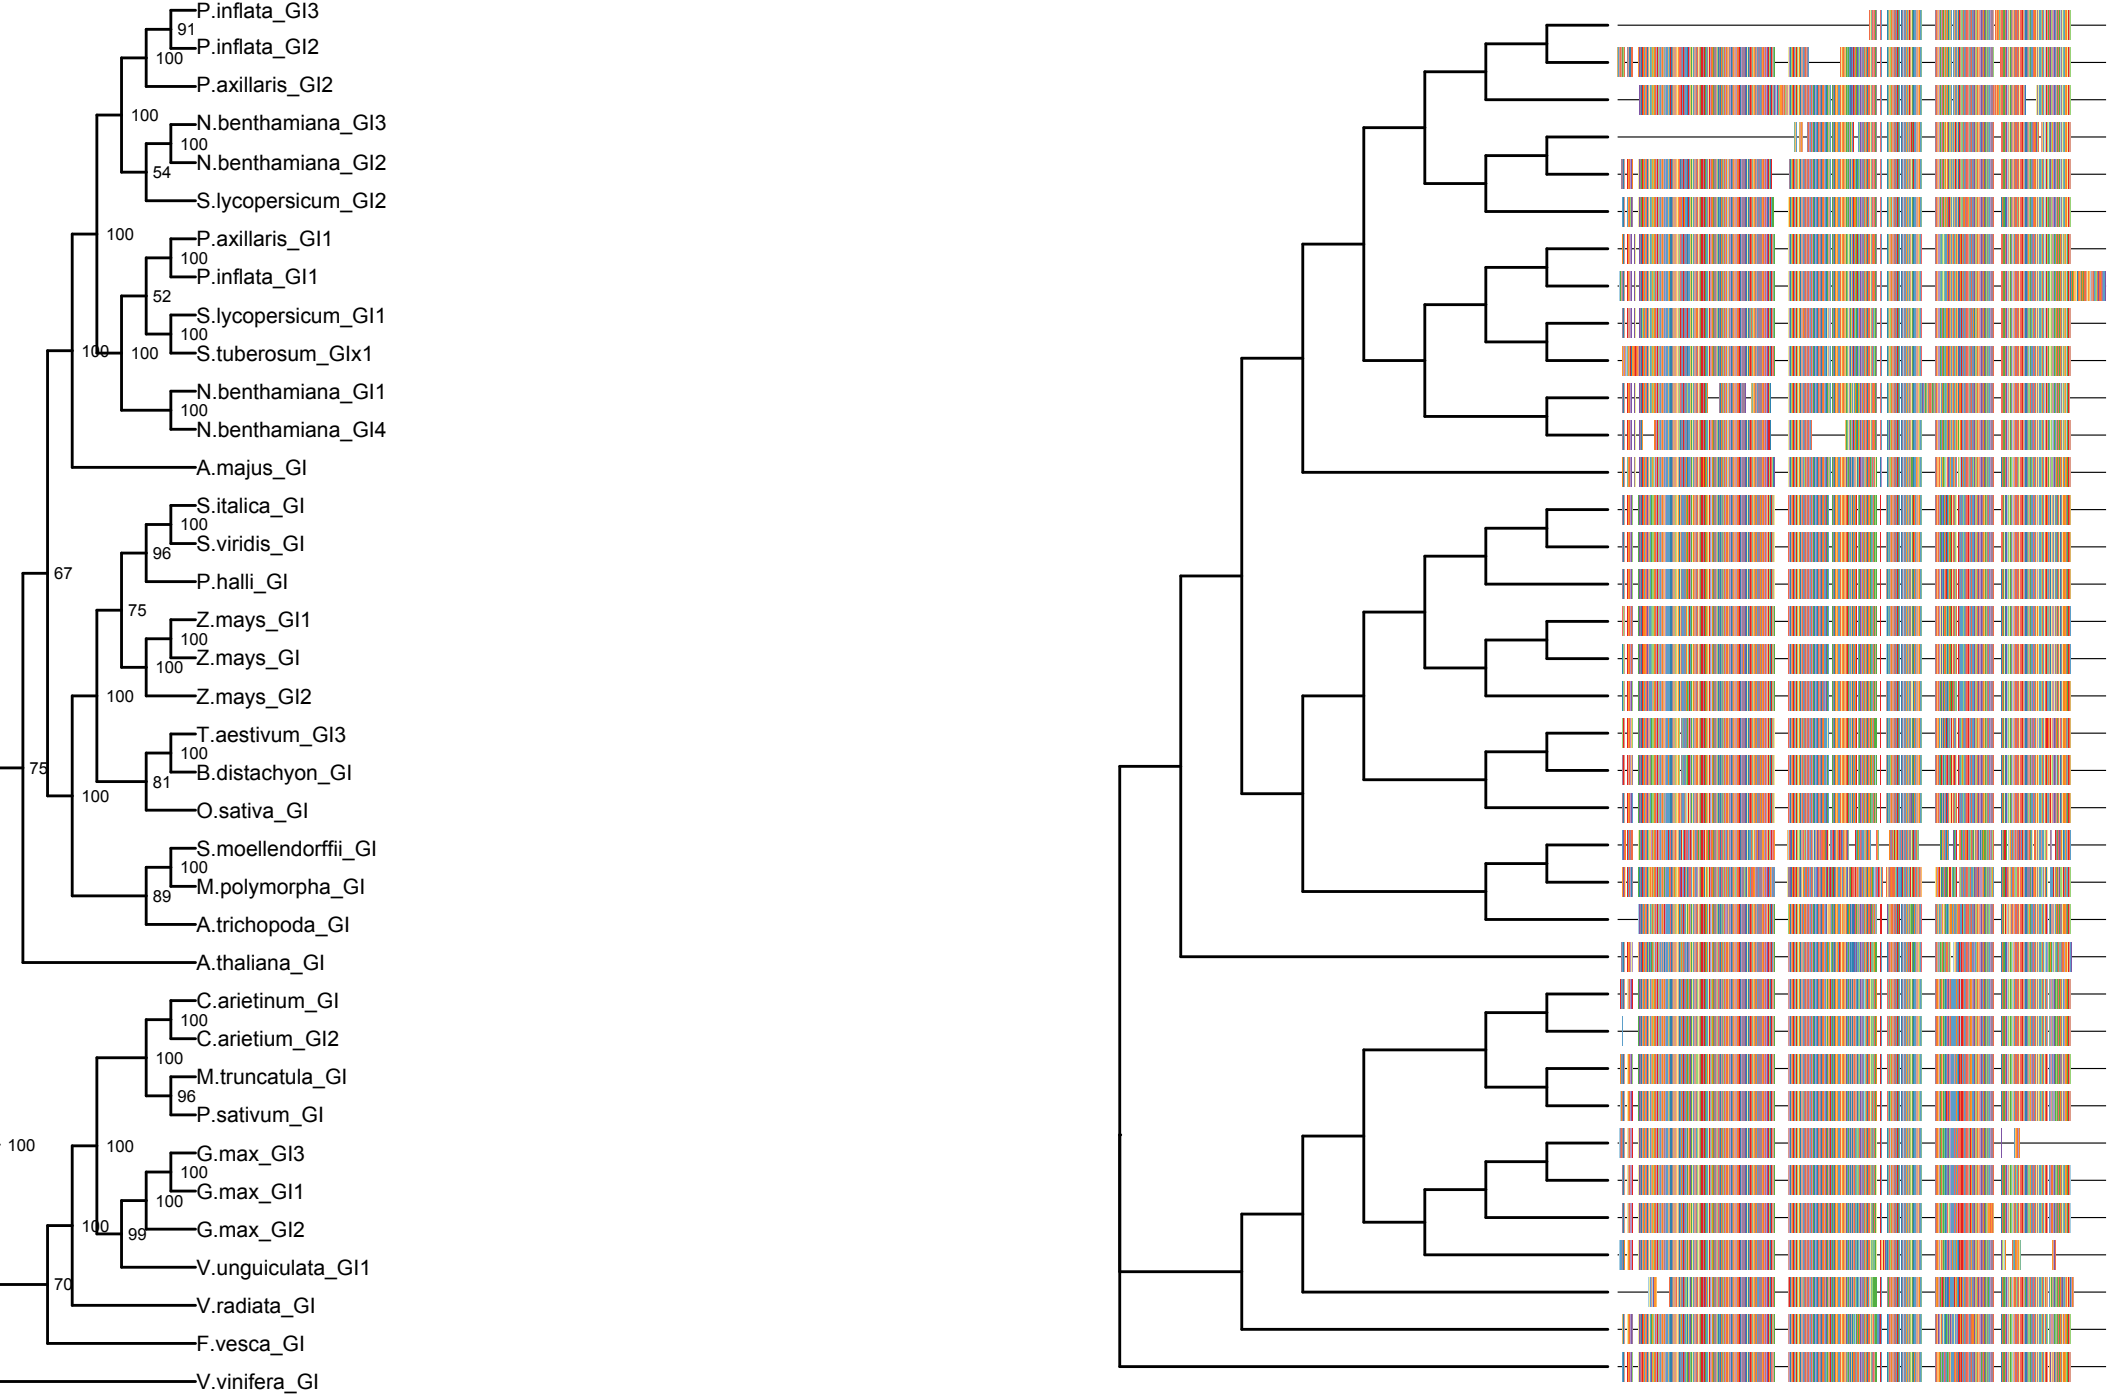

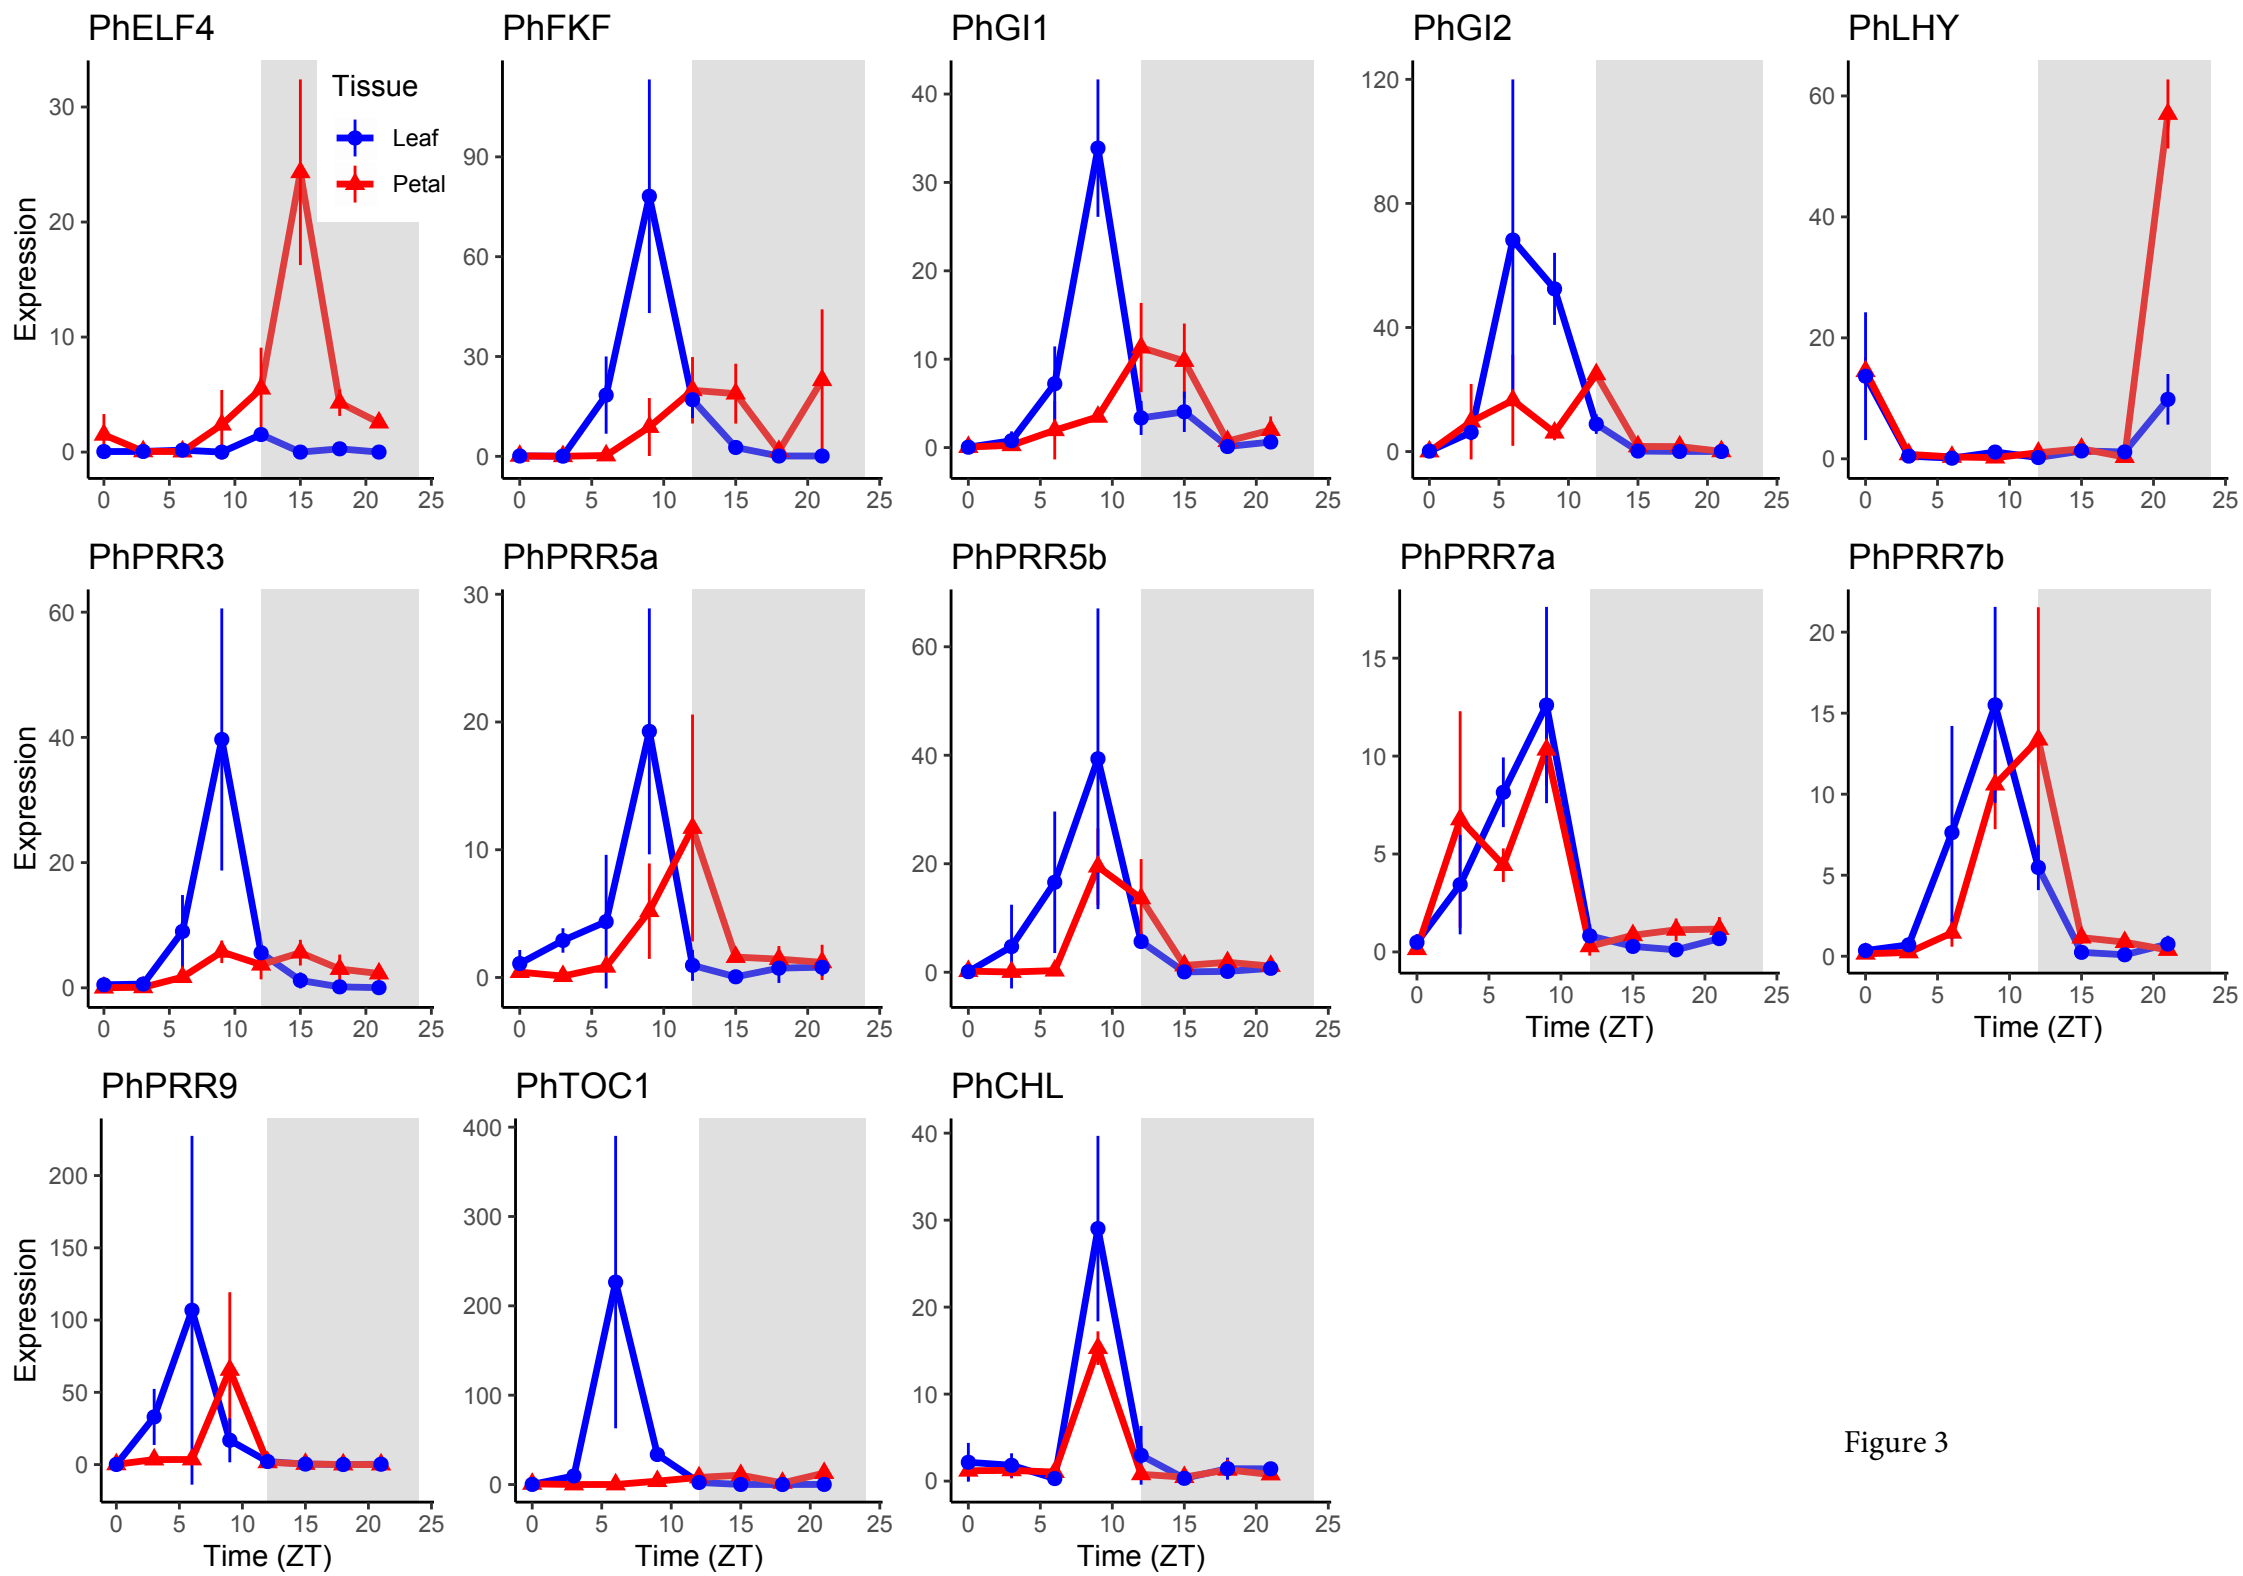

Figure 3

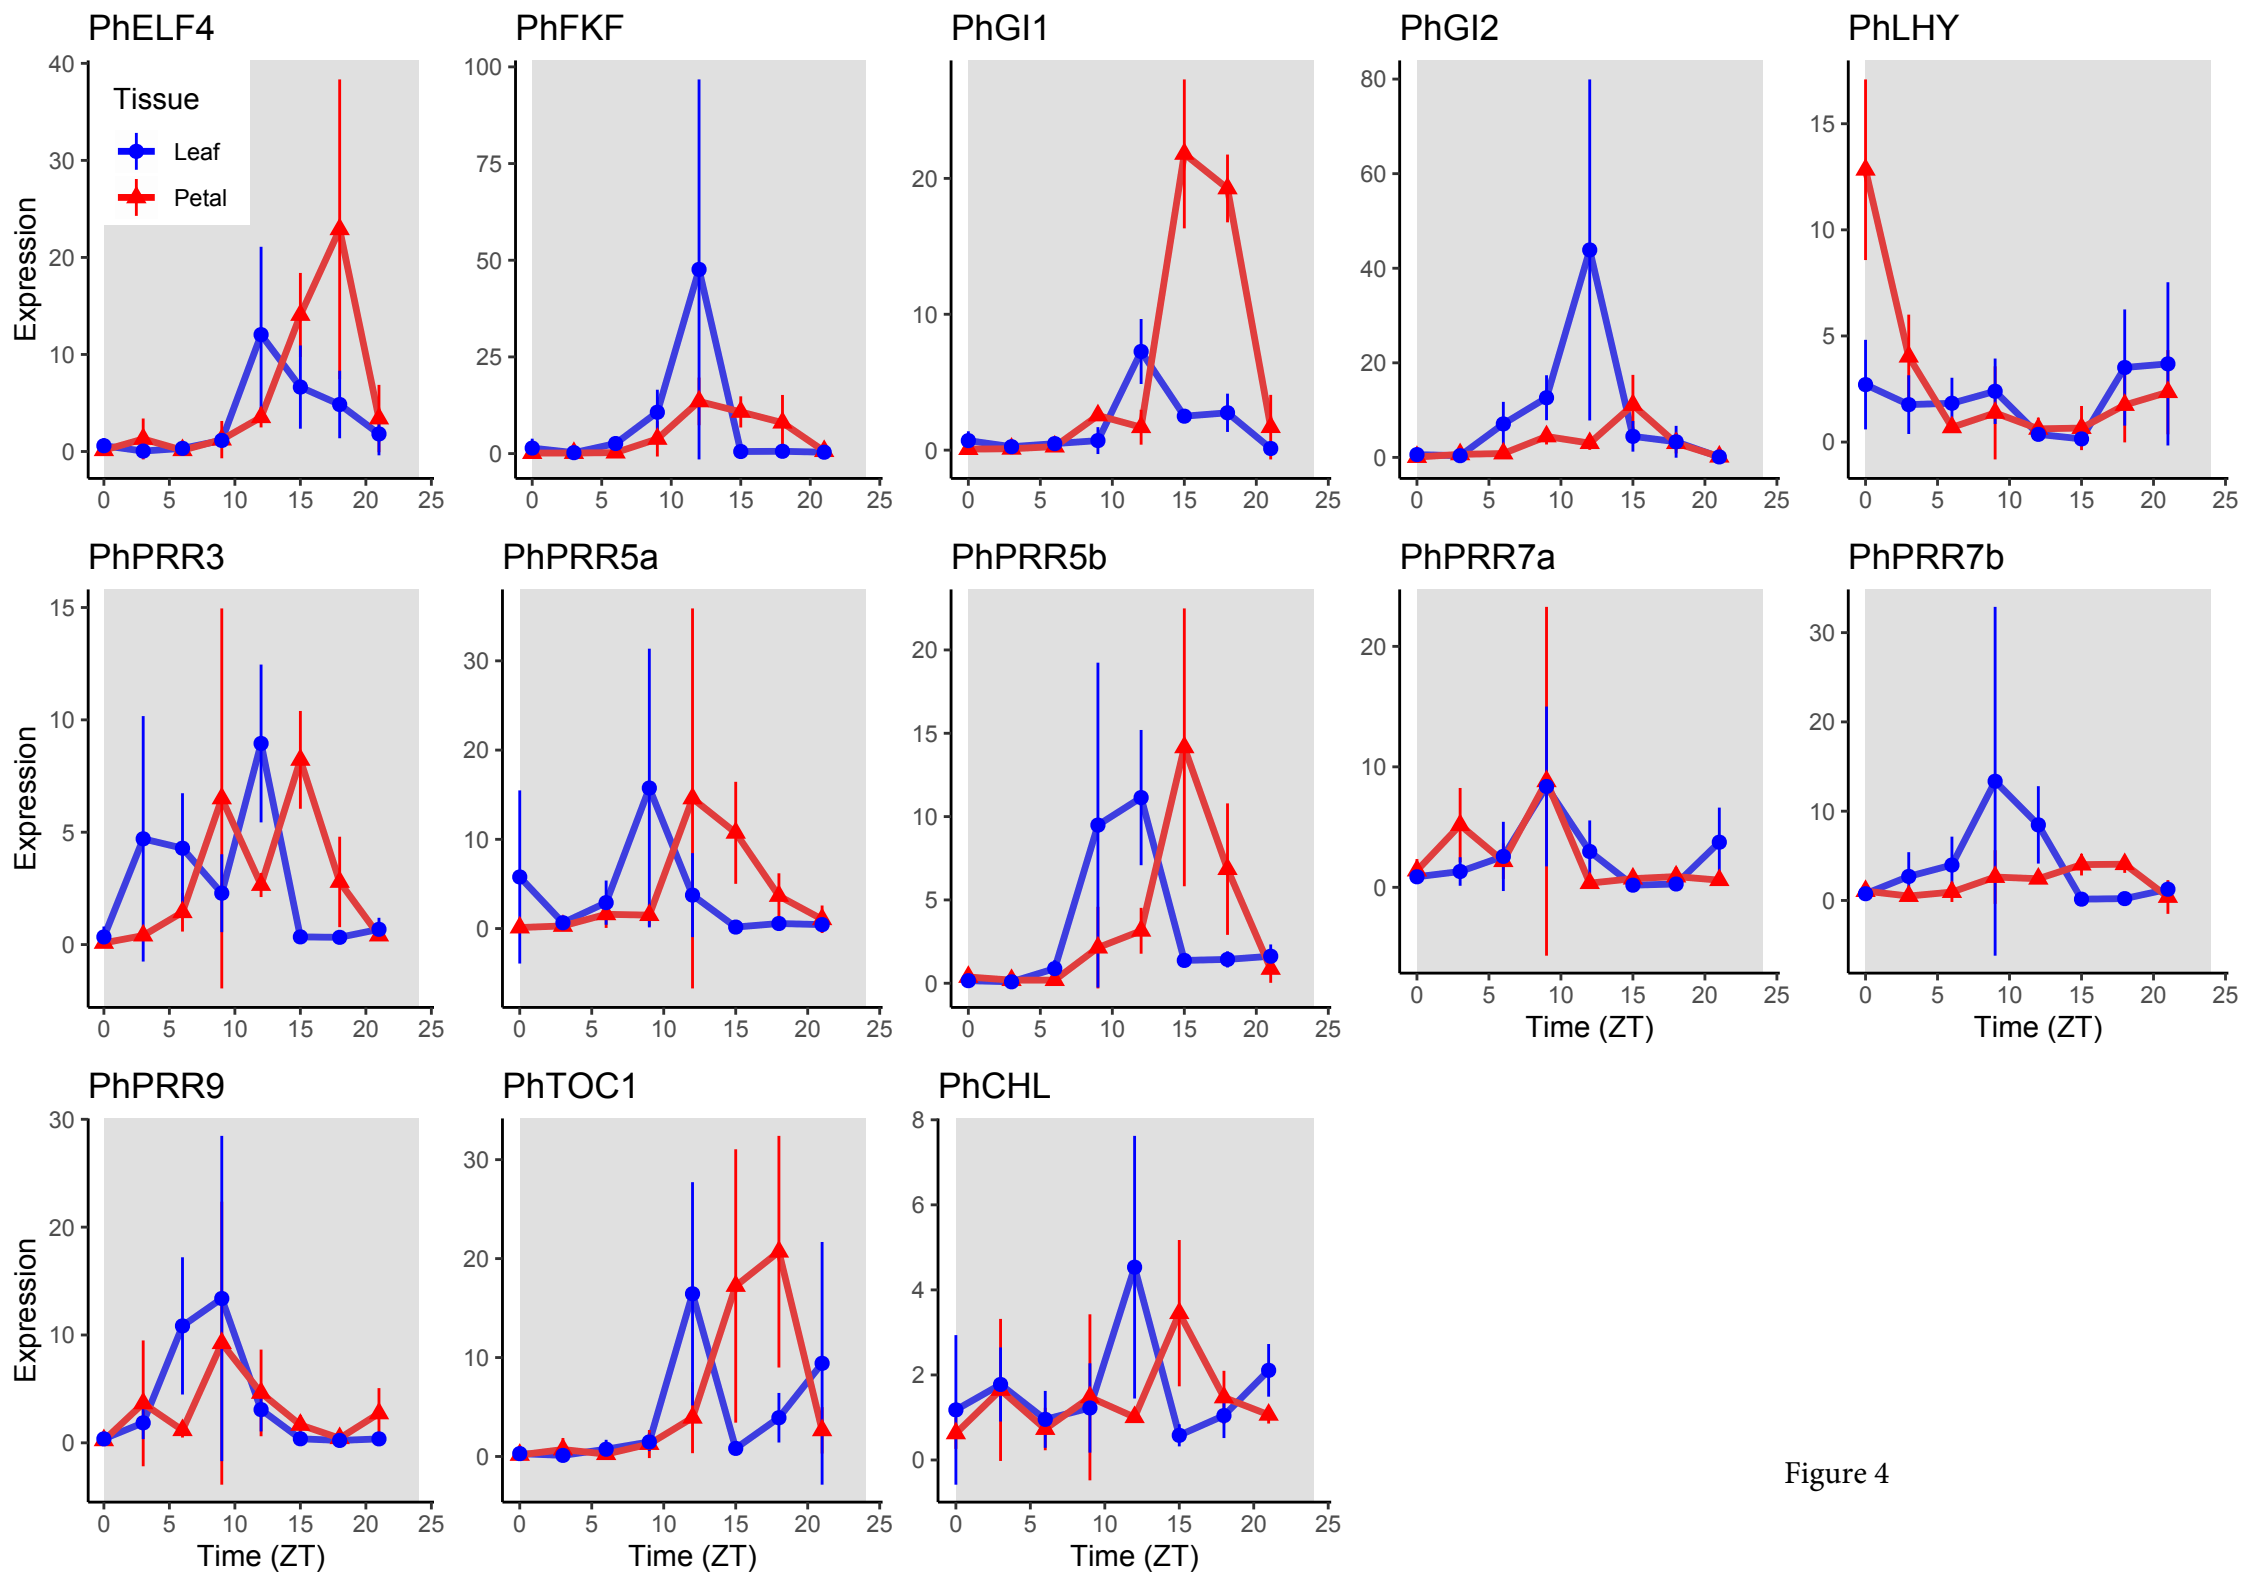

Figure 4



Figure 5

Petunia 12LD, ZT0

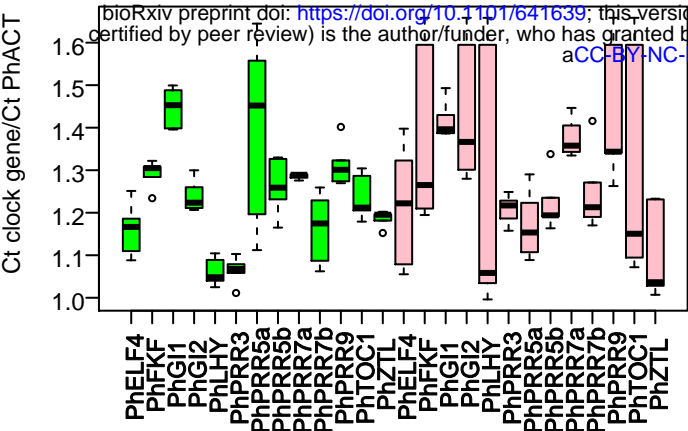

Petunia 12LD, ZT3

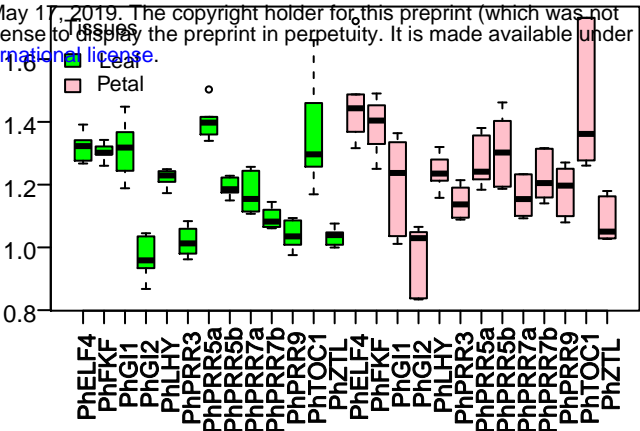

Petunia 12LD, ZT6

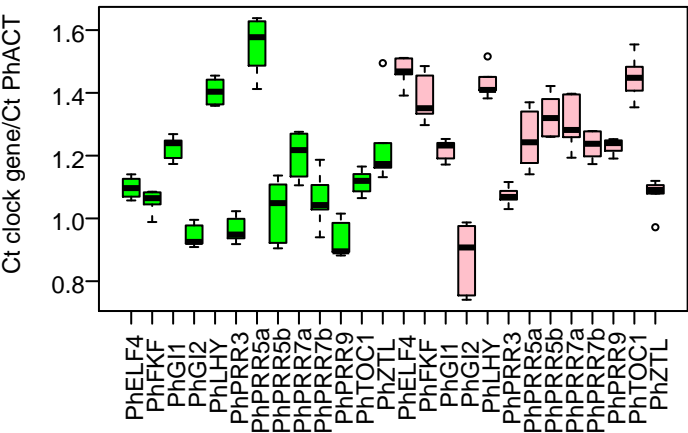

Petunia 12LD, ZT9

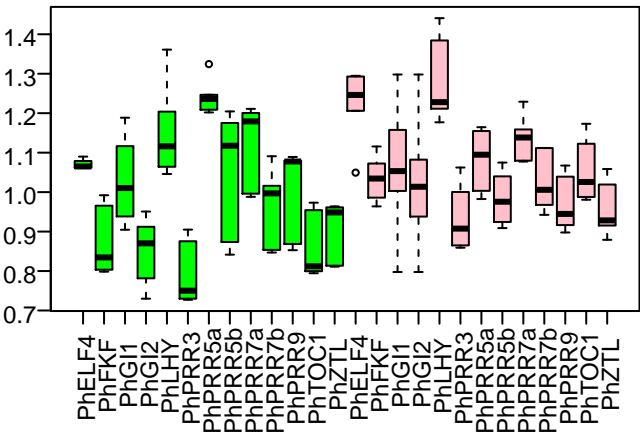

Petunia 12LD, ZT12

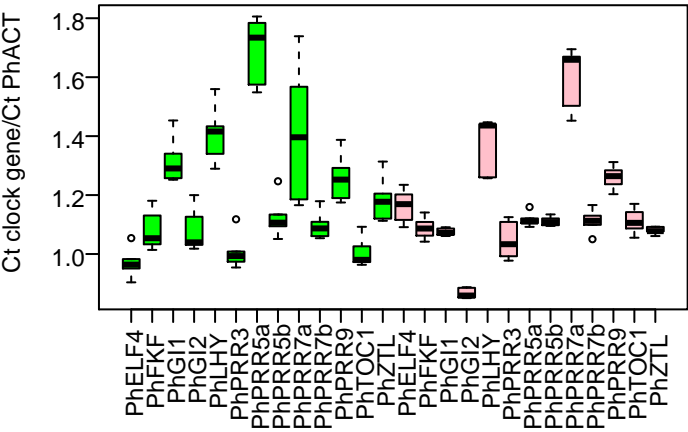

Petunia 12LD, ZT15

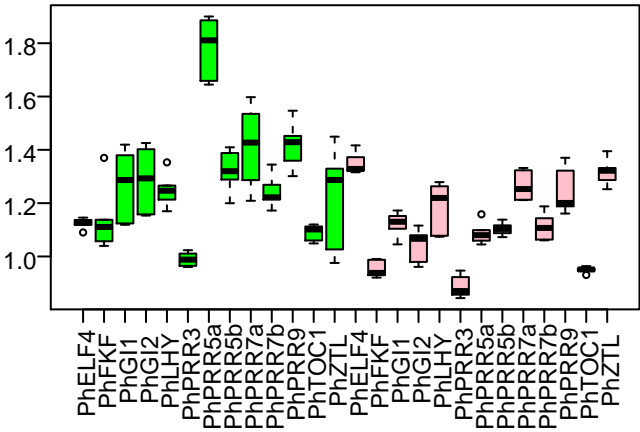

Petunia 12LD, ZT18

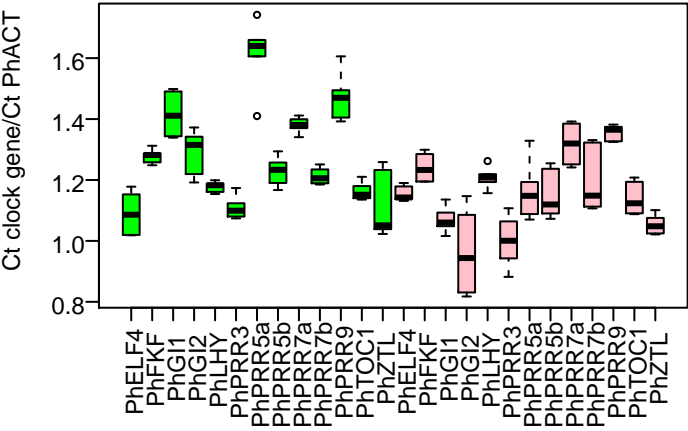

Petunia 12LD, ZT21

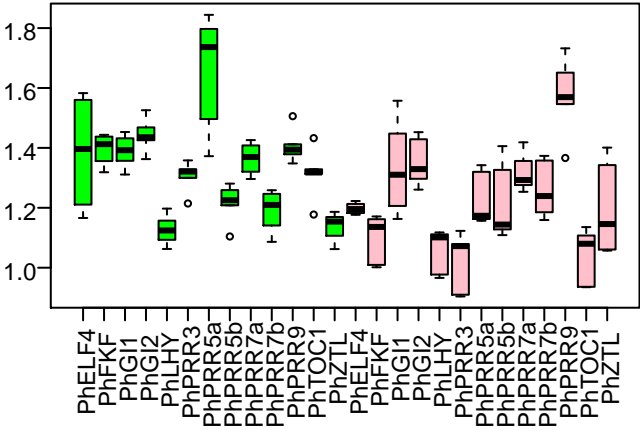

Figure 6

Petunia 12DD, ZT0

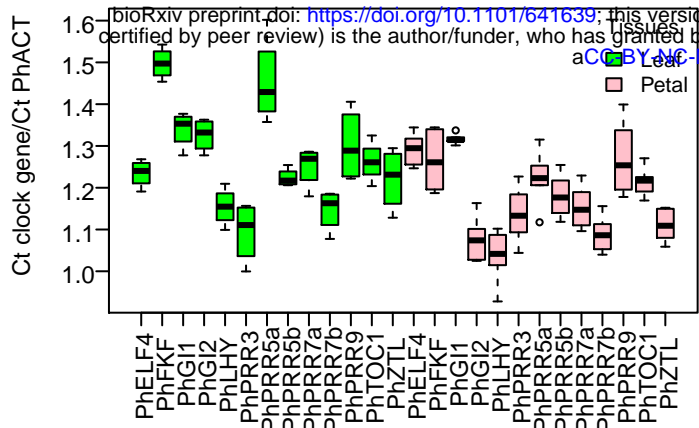

Petunia 12DD, ZT3

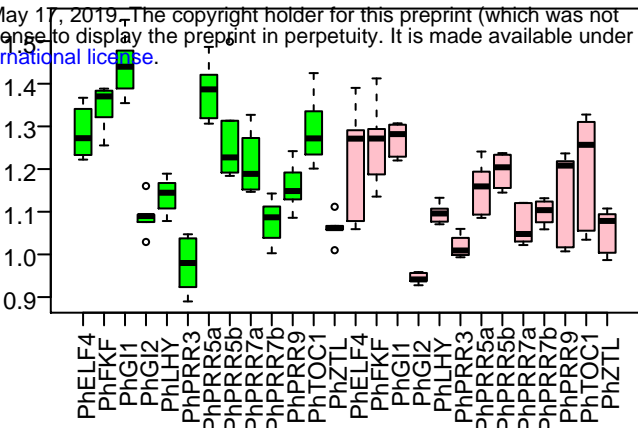

Petunia 12DD, ZT6

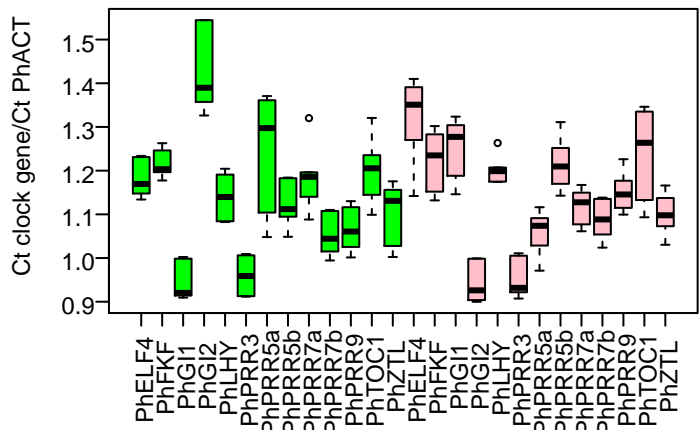

Petunia 12DD, ZT9

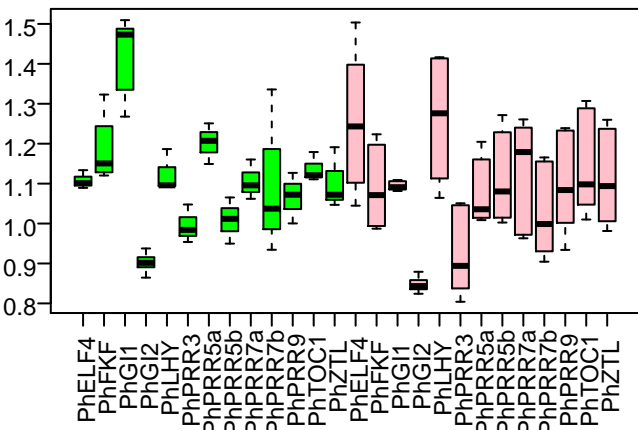

Petunia 12DD, ZT12

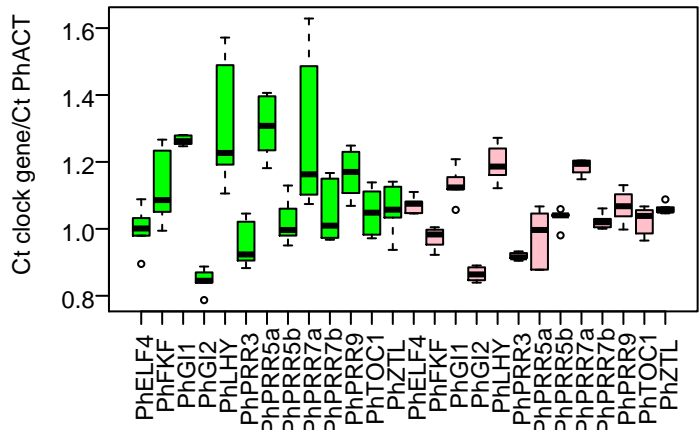

Petunia 12DD, ZT15

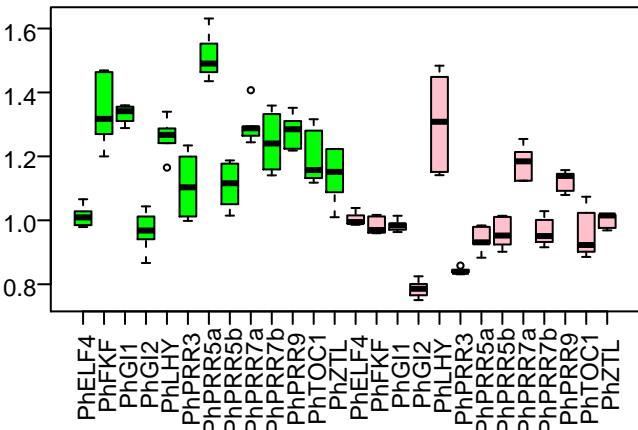

Petunia 12DD, ZT18

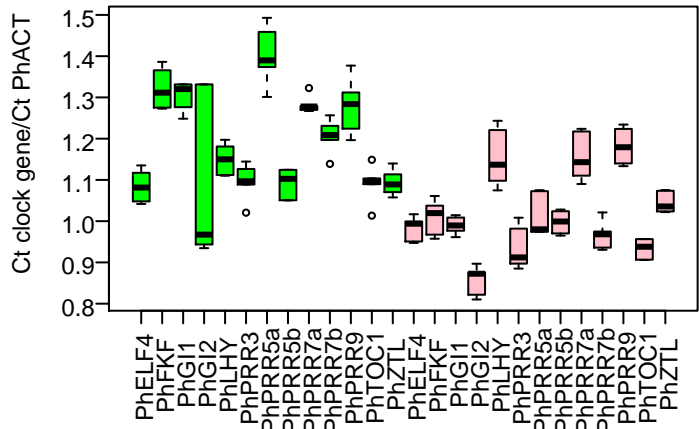

Petunia 12DD, ZT21

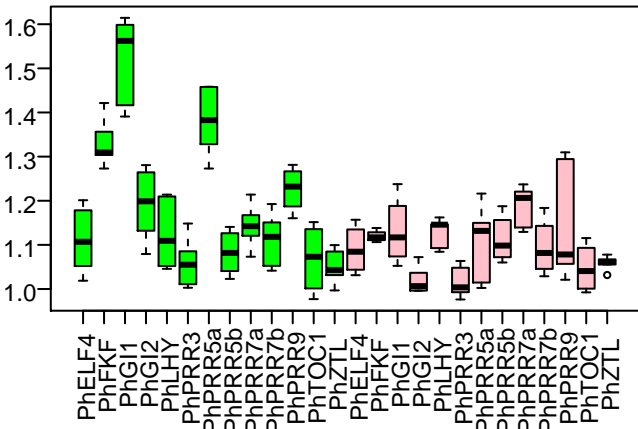

Source: https://www.biorxiv.org/content/10.1101/641639v1.full.pdf
